# Supplementary material for: Peer review of the pesticide risk assessment of the active substance prosulfuron
Source: PubMed Central journal article supplement (PMC7372485; doi:10.2903/j.efsa.2020.6181), 2020-07-20
Supplement: EFS2-18-e06181-s001.pdf [file EFS2-18-e06181-s001.pdf]

Appendix to:

EFSA (European Food Safety Authority), 2020. Conclusion on the peer review of the pesticide risk assessment of the active substance prosulfuron. EFSA Journal 2020;18(7):6181, 35 pp. doi:10.2903/j.efsa.2020.6181

© European Food Safety Authority, 2020

## Appendix A – List of end points for the active substance and the representative formulation

### Identity, Physical and Chemical Properties, Details of Uses, Further Information

|                                      |             |
|--------------------------------------|-------------|
| Active substance (ISO Common Name) ‡ | Prosulfuron |
| Function (e.g. fungicide)            | Herbicide   |
| Rapporteur Member State              | France      |
| Co-rapporteur Member State           | Slovakia    |

### Identity (Annex IIA, point 1)

|                                                                                                                                           |                                                                                                                                                                                                             |
|-------------------------------------------------------------------------------------------------------------------------------------------|-------------------------------------------------------------------------------------------------------------------------------------------------------------------------------------------------------------|
| Chemical name (IUPAC) ‡                                                                                                                   | <i>N</i> -[(4-methoxy-6-methyl-1,3,5-triazin-2-yl)carbamoyl]-2-(3,3,3-trifluoropropyl)benzenesulfonamide<br>or<br>1-(4-methoxy-6-methyl-1,3,5-triazin-2-yl)-3-[2-(3,3,3-trifluoropropyl)phenylsulfonyl]urea |
| Chemical name (CA) ‡                                                                                                                      | <i>N</i> -[[4-methoxy-6-methyl-1,3,5-triazin-2-yl)amino]carbonyl]-2-(3,3,3-trifluoropropyl)benzenesulfonamide                                                                                               |
| CIPAC No ‡                                                                                                                                | 579                                                                                                                                                                                                         |
| CAS No ‡                                                                                                                                  | 94125-34-5                                                                                                                                                                                                  |
| EC No (EINECS or ELINCS) ‡                                                                                                                | Not available                                                                                                                                                                                               |
| FAO Specification (including year of publication) ‡                                                                                       | /                                                                                                                                                                                                           |
| Minimum purity of the active substance as manufactured ‡                                                                                  | 950 g/kg                                                                                                                                                                                                    |
| Identity of relevant impurities (of toxicological, ecotoxicological and/or environmental concern) in the active substance as manufactured | CGA 159902<br>2-(3,3,3-trifluoropropyl)benzenesulfonamide<br>Maximum content 10 g/kg                                                                                                                        |
| Molecular formula ‡                                                                                                                       | C <sub>15</sub> H <sub>16</sub> F <sub>3</sub> N <sub>5</sub> O <sub>4</sub> S                                                                                                                              |
| Molar mass ‡                                                                                                                              | 419.4 g/mol                                                                                                                                                                                                 |

Structural formula ‡

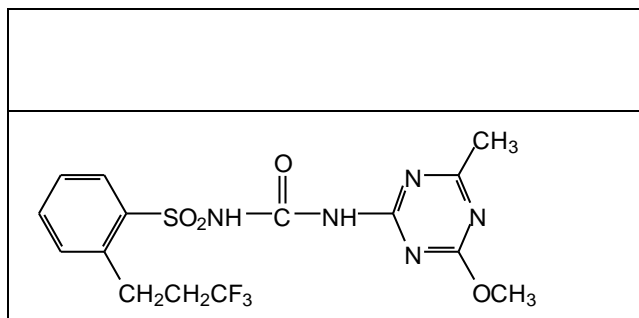

**Physical and chemical properties (Annex IIA, point 2)**

|                                                                          |                                                                                                                                                                                     |
|--------------------------------------------------------------------------|-------------------------------------------------------------------------------------------------------------------------------------------------------------------------------------|
| Melting point (state purity) ‡                                           | 155°C with decomposition (99.5%)                                                                                                                                                    |
| Boiling point (state purity) ‡                                           | Not measurable due to thermal decomposition                                                                                                                                         |
| Temperature of decomposition (state purity)                              | Decomposition begins at about 150°C                                                                                                                                                 |
| Appearance (state purity) ‡                                              | Light beige powder (technical a.i.: 95.1% purity)<br>White powder (pure a.i. : 99.4% purity)                                                                                        |
| Vapour pressure (state temperature, state purity) ‡                      | $< 3.5 \times 10^{-6}$ Pa (25°C, 99.5 % purity)                                                                                                                                     |
| Henry's law constant ‡                                                   | $< 3 \times 10^{-4}$ Pa.m <sup>3</sup> mol <sup>-1</sup>                                                                                                                            |
| Solubility in water (state temperature, state purity and pH) ‡           | pH 5 : 87 mg/L (25°C, 99.5 % purity)<br>pH 6.8 : 4 g/L (25°C)<br>pH 7.7 : 43 g/L (25°C)                                                                                             |
| Solubility in organic solvents ‡<br>(state temperature, state purity)    | At 20°C, 99.5% purity:<br>hexane : 6.4 mg/L - toluene : 6.1 g/L<br>octanol : 1.4 g/L - ethanol : 8.4 g/L<br>ethyl acetate : 56 g/L - acetone : 160 g/L<br>dichloromethane : 180 g/L |
| Surface tension ‡<br>(state concentration and temperature, state purity) | 63 mN/m (20°C, 10.0 g/L suspension in water, 99.5 % purity)                                                                                                                         |
| Partition co-efficient ‡<br>(state temperature, pH and purity)           | pH 5 : 1.5 (25°C, 99.5 % purity)<br>pH 6 : - 0,21 (25°C, 99.5 % purity)<br>pH 9 : - 0,76 (25°C, 99.5 % purity)                                                                      |
| Dissociation constant (state purity) ‡                                   | pKa = 3.76 (20°C, 99.5 % purity)                                                                                                                                                    |
| UV/VIS absorption (max.) incl. $\epsilon$ ‡<br>(state purity, pH)        | $\lambda$ max = 227.5 nm (98.4 % purity)<br>$\epsilon$ : 21645 l.mol <sup>-1</sup> .cm <sup>-1</sup>                                                                                |
| Flammability ‡ (state purity)                                            | Not highly flammable 99.5 % purity                                                                                                                                                  |
| Explosive properties ‡ (state purity)                                    | Not explosive 99.5 % purity                                                                                                                                                         |
| Oxidising properties ‡ (state purity)                                    | No oxidizing properties 99.5 % purity                                                                                                                                               |

## Summary of representative uses evaluated for prosulfuron

| Crop and/or situation (a) | Member State | Product Name | F G I (b) | Pests or group of pests controlled (c) | Formulation |                       | Application                  |                                        |                           |                                      | Application rate per treatment |                     |                   | PHI (days) (l)            | Remarks (m)                                                                                                                              |
|---------------------------|--------------|--------------|-----------|----------------------------------------|-------------|-----------------------|------------------------------|----------------------------------------|---------------------------|--------------------------------------|--------------------------------|---------------------|-------------------|---------------------------|------------------------------------------------------------------------------------------------------------------------------------------|
|                           |              |              |           |                                        | type (d-f)  | Conc of a.i. g/kg (i) | method kind (f-h)            | growth stage and season (j)            | number min-max (k)        | interval between applications (days) | g a.i./hl min-max              | water l/ha; min-max | g a.i./ha min-max |                           |                                                                                                                                          |
| Maize and sweet corn      | EU           | PEAK® 75 WG  | F         | Broad leaved weeds as cited on label   | WG          | 750                   | Broadcast foliar application | BBCH 12-18 corresponding to 2-8 leaves | 1                         | -                                    | 5-25                           | 80-400              | 20                | 90 (grain)<br>60 (silage) | In combination with a nonionic surfactant at 0.1% to 0.25% of application volume                                                         |
| Maize and sweet corn      | EU           | PEAK® 75 WG  | F         | Broad leaved weeds as cited on label   | WG          | 750                   | Broadcast foliar application | BBCH 12-18 corresponding to 2-8 leaves | 1                         | -                                    | 3.75-18.75                     | 80-400              | 15                | 90 (grain)<br>60 (silage) | In combination with a nonionic surfactant at 0.1% to 0.25% of application volume                                                         |
| Maize and sweet corn      | EU           | PEAK® 75 WG  | F         | Broad leaved weeds as cited on label   | WG          | 750                   | Broadcast foliar application | BBCH 12-19 corresponding to 2-9 leaves | 1 (or split application)* | -                                    | 3.75-18.75                     | 80-400              | 15 (total)        | 90 (grain)<br>60 (silage) | In combination with a nonionic surfactant at 0.1% to 0.25% of application volume [split app. is 2 apps to a total of 15g within BBCH 19] |

- (a) For crops, the EU and Codex classification (both) should be taken into account ; where relevant, the use situation should be described (e.g. fumigation of a structure)
- (b) Outdoor or field use (F), greenhouse application (G) or indoor application (I)
- (c) e.g. biting and suckling insects, soil born insects, foliar fungi, weeds
- (d) e.g. wettable powder (WP), emulsifiable concentrate (EC), granule (GR)
- (e) GCPF Codes – GIFAP Technical Monograph N° 2, 1989
- (f) All abbreviations used must be explained
- (g) Method, e.g. high volume spraying, low volume spraying, spreading, dusting, drench
- (h) Kind, e.g. overall, broadcast, aerial spraying, row, individual plant, between the plant – type of equipment used must be indicated (i) Concentration in g ai/kg of g ai/L.
- (i) g/kg or g/L. Normally the rate should be given for the active substance (according to ISO) and not for the variant in order to compare the rate for same active substances used in different variants (e.g. fluoroxypr). **In certain cases, where only one variant synthesised, it is more appropriate to give the rate for the variant (e.g. benthiavalicarb-isopropyl).**
- (j) Growth stage at last treatment (BBCH Monograph, Growth Stages of Plants, 1997, Blackwell, ISBN 3-8263-3152-4), including where relevant, information on season at time of application
- (k) Indicate the minimum and maximum number of application possible under practical conditions of use
- (l) PHI - minimum pre-harvest interval
- (m) Remarks may include: extent of use / economic importance / restrictions

\*split application is 2 applications to a total of 15 g/ha within BBCH 19

## Methods of Analysis

### Analytical methods for the active substance (Annex IIA, point 4.1)

|                                                   |                                                                    |
|---------------------------------------------------|--------------------------------------------------------------------|
| Technical as (analytical technique)               | HPLC-UV (230 nm)                                                   |
| Impurities in technical as (analytical technique) | HPLC-UV (230 nm)<br>GC-FID<br>Karl Fisher potentiometric titration |
| Plant protection product (analytical technique)   | HPLC-UV (230 nm)                                                   |

### Analytical methods for residues (Annex IIA, point 4.2)

#### Residue definitions for monitoring purposes

|                       |                                                                              |
|-----------------------|------------------------------------------------------------------------------|
| Food of plant origin  | Prosulfuron (Draft subject to the data gap on the genotoxicity of CGA150829) |
| Food of animal origin | Prosulfuron                                                                  |
| Soil                  | Prosulfuron                                                                  |
| Water surface         | Prosulfuron                                                                  |
| drinking/ground       | At least prosulfuron, open regarding metabolites                             |
| Air                   | Prosulfuron                                                                  |

#### Monitoring/Enforcement methods

|                                                                                               |                                                                                                                                                                                |
|-----------------------------------------------------------------------------------------------|--------------------------------------------------------------------------------------------------------------------------------------------------------------------------------|
| Food/feed of plant origin (analytical technique and LOQ for methods for monitoring purposes)  | LC-MS/MS<br>LOQ = 0.01 mg/kg in cereals and dry products, acidic matrices, fatty products and commodities with high water content.<br>ILV and confirmatory data are available. |
| Food/feed of animal origin (analytical technique and LOQ for methods for monitoring purposes) | LC-MS/MS<br>LOQ = 0.01 mg/kg in liver, fat, meat, kidney, milk and eggs.<br>ILV and confirmatory data are available.                                                           |
| Soil (analytical technique and LOQ)                                                           | LC-MS/MS<br>LOQ = 0.5 µg/kg in soil<br>Confirmatory method is available                                                                                                        |
| Water (analytical technique and LOQ)                                                          | LC-MS/MS<br>LOQ for prosulfuron = 0.05 µg/L in ground water, drinking water and surface water<br>Confirmatory data are available                                               |
| Air (analytical technique and LOQ)                                                            | LC-MS/MS<br>LOQ = 1 µg/m <sup>3</sup>                                                                                                                                          |
| Body fluids and tissues (analytical technique)                                                | Not required as the active substance is not toxic or                                                                                                                           |

and LOQ)

very toxic

**Classification and proposed labelling with regard to physical and chemical data (Annex IIA, point 10)**

RMS/peer review proposal

Active substance

/

**Groundwater metabolites: Screening for biological activity (SANCO/221/2000-rev.10-final Step 3 a Stage 1)**

Activity against target organism

|               |               |               |               |               |               |               |
|---------------|---------------|---------------|---------------|---------------|---------------|---------------|
| CGA1<br>50829 | CGA1<br>59902 | CGA3<br>00406 | SYN5<br>42604 | CGA3<br>49707 | CGA3<br>25025 | SYN5<br>47308 |
| no            | no            | no            | no            | no            | no            | no            |

## Impact on Human and Animal Health

### Other toxicological studies (Annex IIA, point 5.8)

Studies performed on metabolites or impurities  
‡

- CGA159902 (CA1118A):

Acute oral LD<sub>50</sub> > 2000 mg/kg bw

Acute dermal LD<sub>50</sub> > 2000 mg/kg bw

Not a skin or eye irritant

Sensitiser (M&K test) – H317

*In vitro* genotoxicity tests - Ames test: negative; mouse lymphoma assay: positive (small colonies); cytogenetic assay in human lymphocytes: positive

*In vivo* genotoxicity tests – UDS assay: negative; mouse bone marrow micronucleus test: negative

Unlikely to be genotoxic *in vivo*.

- CGA150829 (triazine amine):

Acute oral LD<sub>50</sub> > 2000 mg/kg bw (M); =1000 mg/kg bw (F) – R22

Acute dermal LD<sub>50</sub> > 2000 mg/kg bw

Acute inhalation LC<sub>50</sub> > 5.2 mg/L

Not a skin or eye irritant

Not a sensitiser (M&K test)

Genotoxic potential cannot be concluded.

- CGA325025:

*In vitro* genotoxicity tests - Ames test, mouse lymphoma assay: negative; cytogenetic assay in human lymphocytes: equivocal.

Genotoxic potential cannot be excluded.

- CGA349707:

*In vitro* genotoxicity tests - Ames test, mouse lymphoma assay and cytogenetic assay in human lymphocytes: negative.

ADI of 0.001 mg/kg per day.

- SYN547308:

*In vitro* genotoxicity tests - Ames test, mouse lymphoma assay: negative; cytogenetic assay in human lymphocytes: positive.

*In vivo* genotoxicity tests – mouse bone marrow micronucleus test: negative

Genotoxic *in vitro*, not *in vivo*.

- SYN542604:

*In vitro* genotoxicity tests - Ames test, mouse lymphoma assay and cytogenetic assay in human lymphocytes: negative.

Unlikely to be genotoxic.

- CGA300406:

*In vitro* genotoxicity tests - Ames test, mouse lymphoma assay: negative; cytogenetic assay in human lymphocytes: positive.

*In vivo* genotoxicity tests – mouse bone marrow micronucleus test: negative

Genotoxic *in vitro*, not *in vivo*.



**Metabolism in plants (Annex IIA, point 6.1 and 6.7, Annex IIIA, point 8.1 and 8.6)**

|                                                                                         |                                                                              |
|-----------------------------------------------------------------------------------------|------------------------------------------------------------------------------|
| Plant groups covered                                                                    | Cereals (maize)                                                              |
| Rotational crops                                                                        | Radish, spinach, wheat, lettuce                                              |
| Metabolism in rotational crops similar to metabolism in primary crops?                  | Yes                                                                          |
| Processed commodities                                                                   | Not necessary                                                                |
| Residue pattern in processed commodities similar to residue pattern in raw commodities? | -                                                                            |
| Plant residue definition for monitoring                                                 | Prosulfuron (Draft subject to the data gap on the genotoxicity of CGA150829) |
| Plant residue definition for risk assessment                                            | Prosulfuron (Draft subject to the data gap on the genotoxicity of CGA150829) |
| Conversion factor (monitoring to risk assessment)                                       | -                                                                            |

**Metabolism in livestock (Annex IIA, point 6.2 and 6.7, Annex IIIA, point 8.1 and 8.6)**

|                                                               |                                                            |
|---------------------------------------------------------------|------------------------------------------------------------|
| Animals covered                                               | Goat, hen                                                  |
| Time needed to reach a plateau concentration in milk and eggs | Milk: n.a.<br>Eggs : 2 days (egg white), 6 days (egg yolk) |
| Animal residue definition for monitoring                      | Prosulfuron                                                |
| Animal residue definition for risk assessment                 | Prosulfuron                                                |
| Conversion factor (monitoring to risk assessment)             | -                                                          |
| Metabolism in rat and ruminant similar (yes/no)               | Yes                                                        |
| Fat soluble residue: (yes/no)                                 | No ( $\log P_{ow} = -0.21$ at pH 6)                        |

**Residues in succeeding crops (Annex IIA, point 6.6, Annex IIIA, point 8.5)**

No accumulation in soil.  
No uptake of soil specific metabolites.

**Stability of residues (Annex IIA, point 6 introduction, Annex IIIA, point 8 Introduction)**

Residues of prosulfuron are stable under freezer storage for at least 25 months (maize grain and forage; beef muscle, beef liver, and milk), 12 months in maize oil and 16 months in eggs

**Residues from livestock feeding studies (Annex IIA, point 6.4, Annex IIIA, point 8.3)**

|                                                                                                             | Ruminant                                                                                                                                                                                | Poultry                               | Pig |
|-------------------------------------------------------------------------------------------------------------|-----------------------------------------------------------------------------------------------------------------------------------------------------------------------------------------|---------------------------------------|-----|
|                                                                                                             | Conditions of requirement of feeding studies                                                                                                                                            |                                       |     |
| Expected intakes by livestock $\geq 0.1$ mg/kg diet (dry weight basis) (yes/no - If yes, specify the level) | No (but study available)                                                                                                                                                                | No (but study available)              | No  |
| Potential for accumulation (yes/no)                                                                         | No                                                                                                                                                                                      | No                                    | No  |
| Metabolism studies indicate potential level of residues $\geq 0.01$ mg/kg in edible tissues (yes/no)        | No                                                                                                                                                                                      | No                                    | No  |
|                                                                                                             | Feeding studies (feeding study on lactating cows 5, 15, 50 ppm in the feed; feeding study on laying hens 0.1, 0.3, 1 ppm in the feed).<br>Residue levels in matrices : Mean (max) mg/kg |                                       |     |
| Muscle                                                                                                      | <0.05 mg/kg whatever the feeding dose                                                                                                                                                   | <0.05 mg/kg whatever the feeding dose | -   |
| Liver                                                                                                       | <0.05 mg/kg whatever the feeding dose                                                                                                                                                   | <0.05 mg/kg whatever the feeding dose | -   |
| Kidney                                                                                                      | <0.05 mg/kg whatever the feeding dose                                                                                                                                                   | <0.05 mg/kg whatever the feeding dose | -   |
| Fat                                                                                                         | <0.05 mg/kg whatever the feeding dose                                                                                                                                                   | <0.05 mg/kg whatever the feeding dose | -   |
| Milk                                                                                                        | <0.01 mg/kg whatever the feeding dose                                                                                                                                                   |                                       |     |
| Eggs                                                                                                        |                                                                                                                                                                                         | <0.05 mg/kg whatever the feeding dose |     |

**Summary of residues data according to the representative uses on raw agricultural commodities and feedingstuffs (Annex IIA, point 6.3, Annex IIIA, point 8.2)**

| Crop       | Northern or Mediterranean Region, field or glasshouse, and any other useful information | Trials results relevant to the representative uses<br>(a) | Recommendation/comments                                             | MRL estimated from trials according to the representative use | HR<br>(c) | STMR<br>(b) |
|------------|-----------------------------------------------------------------------------------------|-----------------------------------------------------------|---------------------------------------------------------------------|---------------------------------------------------------------|-----------|-------------|
| Maize      | Northern EU                                                                             | 8×<0.01; 4×<0.02                                          | EU intended GAP : foliar treatment, 20 g as/ha, PHI 90 days (grain) | 0.02*                                                         | <0.02     | <0.01       |
|            | Southern EU                                                                             | 4×<0.01; 3×<0.02                                          |                                                                     |                                                               | <0.02     | <0.01       |
| Sweet corn | Northern EU                                                                             | 11×<0.01                                                  | EU intended GAP : foliar treatment, 20 g as/ha, PHI 90 days (grain) | 0.02*                                                         | <0.01     | <0.01       |
|            | Southern EU                                                                             | 4×<0.01                                                   |                                                                     |                                                               | <0.01     | <0.01       |

(a) Numbers of trials in which particular residue levels were reported *e.g.* 3 × <0.01, 1 × 0.01, 6 × 0.02, 1 × 0.04, 1 × 0.08, 2 × 0.1, 2 × 0.15, 1 × 0.17

(b) Supervised Trials Median Residue *i.e.* the median residue level estimated on the basis of supervised trials relating to the representative use

(c) Highest residue

\* The MRL is proposed at the LOQ.

**Consumer risk assessment (Annex IIA, point 6.9, Annex IIIA, point 8.8)**

|                                                                                       |                                    |
|---------------------------------------------------------------------------------------|------------------------------------|
| ADI                                                                                   | 0.02 mg/kg bw per day              |
| TMDI (% ADI) according to WHO European diet                                           | 0.3 % (WHO cluster diet B)         |
| TMDI (% ADI) according to French diets                                                | 0.01 % (FR toddler)                |
| IEDI (WHO European Diet) % ADI                                                        | Not performed as TMDI is below ADI |
| NEDI (specify diet) (% ADI)                                                           | N/A                                |
| Factors included in IEDI and NEDI                                                     | N/A                                |
| ARfD                                                                                  | 0.1 mg/kg bw                       |
| IESTI (%ARfD)                                                                         | 0.7% (sweet corn)<br>0.1% (maize)  |
| NESTI (% ARfD) according to national (to be specified) large portion consumption data | N/A                                |
| Factors included in IESTI and NESTI                                                   | N/A                                |

**Processing factors (Annex IIA, point 6.5, Annex IIIA, point 8.4)**

Not necessary as residue level in RAC < 0.1 mg/kg

**Proposed MRLs (Annex IIA, point 6.7, Annex IIIA, point 8.6)**

|             |             |
|-------------|-------------|
| Maize grain | 0.02* mg/kg |
| Sweet corn  | 0.02* mg/kg |

When the MRL is proposed at the LOQ, this should be annotated by an asterisk after the figure.

### Route of degradation (aerobic) in soil (Annex IIA, point 7.1.1.1.1)

|                                                                                                       |                                                                                                                                                                                                                                                                                                                                                                                                                                                                        |
|-------------------------------------------------------------------------------------------------------|------------------------------------------------------------------------------------------------------------------------------------------------------------------------------------------------------------------------------------------------------------------------------------------------------------------------------------------------------------------------------------------------------------------------------------------------------------------------|
| Mineralization after 100 days ‡                                                                       | up to 13.1 % (phenyl) and 21.5 % (triazine) after 120 days                                                                                                                                                                                                                                                                                                                                                                                                             |
| Non-extractable residues after 100 days ‡                                                             | 12-44 % (phenyl) after 90 days; max. 57% after 1 year<br>9-34.5 % (triazine) after 90 days                                                                                                                                                                                                                                                                                                                                                                             |
| Metabolites requiring further consideration ‡<br>- name and/or code, % of applied (range and maximum) | prosulfuron phenyl sulfonamide (CGA159902): max. 47.4 % after 12 months<br>prosulfuron triazine amine (CGA150829): max. 40.6 % after 62 days<br>O-desmethyl-prosulfuron (CGA300406): max. 24.0 % after 30 days<br>demethoxy amino-prosulfosulfuron (CGA 325025): max. 17.4 % after 274 days<br>CGA349707: max. 22.6 % after 12 months<br>SYN542604: max. 30.8 % after 62 days<br>M17 (pending identification, 6.1% at study end)<br>M18 (SYN547308, 9.9% at study end) |

### Route of degradation in soil - Supplemental studies (Annex IIA, point 7.1.1.1.2)

|                                                                                                                             |                                                                                                                                                                                                                                                                                                                   |
|-----------------------------------------------------------------------------------------------------------------------------|-------------------------------------------------------------------------------------------------------------------------------------------------------------------------------------------------------------------------------------------------------------------------------------------------------------------|
| Anaerobic degradation ‡                                                                                                     |                                                                                                                                                                                                                                                                                                                   |
| Mineralization after 100 days                                                                                               | 0.1-0.4 % after 90 days (both labels)                                                                                                                                                                                                                                                                             |
| Non-extractable residues after 100 days                                                                                     | 8-16 % after 90 days (both labels)                                                                                                                                                                                                                                                                                |
| Metabolites that may require further consideration for risk assessment – name and/or code, % of applied (range and maximum) | No novel major metabolites compared to aerobic conditions.<br>prosulfuron phenyl sulfonamide (CGA159902): max. 20.4 % after 92 days<br>prosulfuron triazine amine (CGA150829): max. 8.3 % after 90 days<br>O-desmethyl-prosulfuron (CGA300406): max. 8.2 % after 92 days<br>CGA 325025: max. 16.3 % after 90 days |
| Soil photolysis ‡                                                                                                           |                                                                                                                                                                                                                                                                                                                   |
| Metabolites that may require further consideration for risk assessment – name and/or code, % of applied (range and maximum) | No novel major metabolites compared to aerobic conditions.<br>prosulfuron phenyl sulfonamide (CGA159902), O-desmethyl-prosulfuron (CGA300406) and 3 unidentified metabolites (from triazine moiety) all <5%                                                                                                       |

### Rate of degradation in soil (Annex IIA, point 7.1.1.2, Annex IIIA, point 9.1.1)

## Laboratory studies ‡

| Prosulfuron                       |                                               | Dark aerobic conditions. |                   |                                               |                                                          |                     |                          |
|-----------------------------------|-----------------------------------------------|--------------------------|-------------------|-----------------------------------------------|----------------------------------------------------------|---------------------|--------------------------|
| Study                             | Soil type                                     | pH                       | t. °C / %<br>MWHC | DT <sub>50</sub> /<br>DT <sub>90</sub><br>(d) | DT <sub>50</sub> (d)<br>20 °C<br>pF2/10kPa <sup>a)</sup> | St.<br>( $\chi^2$ ) | Method of<br>calculation |
| Fahrbach,<br>2011                 | 18 Acres (phenyl)<br>Sandy clay loam          | 5.84                     | 20 / pF2          | 22.5 /<br>74.7                                | 22.5                                                     | 7.2                 | SFO                      |
|                                   | 18 Acres<br>(triazine)<br>Sandy clay loam     | 5.84                     | 20 / pF2          | 18.9 /<br>62.8                                | 18.9                                                     | 9.8                 | SFO                      |
| Fahrbach,<br>2011a                | 18 Acres<br>(triazine)<br>Sandy clay loam     | 5.84                     | 20 / pF2          | 21.0 /<br>69.9                                | 21.0                                                     | 8.3                 | SFO                      |
|                                   | Vétroz (triazine)<br>Loam                     | 7.77                     | 20 / pF2          | 41.3 / 137                                    | 41.3                                                     | 2.4                 | SFO                      |
|                                   | Krone (triazine)<br>Silt loam                 | 5.38                     | 20 / pF2          | 15.4 /<br>51.1                                | 15.4                                                     | 9.3                 | SFO                      |
|                                   | Nebraska<br>(triazine)<br>Silt loam           | 6.61                     | 20 / pF2          | 61.1 / 203                                    | 61.1                                                     | 6.9                 | SFO                      |
| Atkins,<br>1993a                  | Fayette (phenyl)<br>Sandy loam                | 6.6                      | 25 / 75% FC       | 88.9 / 295                                    | 106                                                      | 8.4                 | SFO                      |
| Atkins,<br>1993b                  | Fayette (triazine)<br>Sandy loam              | 6.6                      | 25 / 75% FC       | 192 / 639                                     | 229                                                      | 3.3                 | SFO                      |
| Atkins,<br>1994a <sup>c)</sup>    | Madison (phenyl)<br>Sandy loam                | 6.1                      | 25 / 75% FC       | 143 / 476                                     | 142                                                      | 4.6                 | SFO                      |
| Atkins,<br>1994b <sup>d)</sup>    | Madison (triazine)<br>Sandy loam              | 6.1                      | 25 / 75% FC       | 124 / 410                                     | 122                                                      | 4.0                 | SFO                      |
| Reischmann,<br>1994 <sup>e)</sup> | Neuhofen<br>(phenyl)<br>Loamy sand            | 6.6                      | 20 / 40%<br>MWHC  | 177 / 589                                     | 124                                                      | 3.6                 | SFO                      |
|                                   | Collombey<br>(phenyl)<br>Loamy sand /<br>sand | 7.2                      | 20 / 40%<br>MWHC  | 138 / 459                                     | 98.2                                                     | 5.2                 | SFO                      |
|                                   | Stein (phenyl)<br>Sandy loam /<br>loam        | 7.0                      | 20 / 40%<br>MWHC  | 198 / 657                                     | 132                                                      | 3.2                 | SFO                      |
|                                   | Les Evouettes<br>(phenyl)<br>Silt loam        | 7.3                      | 20 / 40%<br>MWHC  | 74.3 / 247                                    | 47.2                                                     | 5.6                 | SFO                      |
| Reischmann,<br>1995 <sup>d)</sup> | Les Evouettes<br>(phenyl)<br>Silt loam        | 7.0                      | 20 / 60% FC       | 24.4 /<br>80.9                                | 21.9                                                     | 7.2                 | SFO                      |
| Geometric mean (n=10)             |                                               |                          |                   |                                               | 62.1 <sup>b)</sup>                                       |                     |                          |
| Median (n=10)                     |                                               |                          |                   |                                               | 79.7 <sup>b)</sup>                                       |                     |                          |

a) Normalised using a Q<sub>10</sub> of 2.58 and Walker equation coefficient of 0.7

b) Geometric mean of replicate soils calculated first (18 Acres 20.8 days; Fayette 156 days; Madison 131 days; Les Evouettes 32.2 days)

c) In the original DAR Atkins 1994j

d) In the original DAR Atkins 1994a

e) In the original DAR Reischmann 1994a

f) In the original DAR Reischmann 1994b

| TRIAZINE AMINE<br>(CGA150829)       |                                              | Dark aerobic conditions. Metabolite dosed or the precursor from which the f.f. was derived was parent prosulfuron. |                    |                                            |       |                                                          |                     |                          |
|-------------------------------------|----------------------------------------------|--------------------------------------------------------------------------------------------------------------------|--------------------|--------------------------------------------|-------|----------------------------------------------------------|---------------------|--------------------------|
| Study                               | Soil type                                    | pH                                                                                                                 | t. °C / %<br>MWHC  | DT <sub>50</sub> / DT <sub>90</sub><br>(d) | f. f. | DT <sub>50</sub> (d)<br>20 °C<br>pF2/10kPa <sup>a)</sup> | St.<br>( $\chi^2$ ) | Method of<br>calculation |
| Fahrbach,<br>2011                   | 18 Acres<br>(triazine)<br>Sandy clay<br>loam | 5.84                                                                                                               | 20 / pF2           | 295 / 979                                  | 0.36  | 295                                                      | 10.4                | SFO                      |
| Fahrbach,<br>2011a                  | 18 Acres<br>(triazine)<br>Sandy clay<br>loam | 5.84                                                                                                               | 20 / pF2           | 228 / 757                                  | 0.28  | 228                                                      | 2.9                 | SFO                      |
|                                     | Vétroz<br>(triazine)<br>Loam                 | 7.77                                                                                                               | 20 / pF2           | 61.9 / 205                                 | 0.11  | 61.9                                                     | 16.8                | SFO                      |
|                                     | Krone<br>(triazine)<br>Silt loam             | 5.38                                                                                                               | 20 / pF2           | >1000 /<br>>1000                           | 0.45  | 1000                                                     | 7.3                 | SFO                      |
|                                     | Nebraska<br>(triazine)<br>Silt loam          | 6.61                                                                                                               | 20 / pF2           | >1000 /<br>>1000                           | 0.26  | 1000                                                     | 22.4                | SFO                      |
| Jungmann<br>&<br>Nicollier,<br>2006 | 18 Acres<br>Sandy clay<br>loam               | 5.0                                                                                                                | 20 / pF2           | 249 / 828                                  | -     | 249                                                      | 1                   | SFO                      |
|                                     | Gartenacker<br>Loam                          | 6.9                                                                                                                | 20 / pF2           | 102.2 / 339                                | -     | 102.2                                                    | 4                   | SFO                      |
|                                     | Krone<br>Silt loam                           | 4.9                                                                                                                | 20 / pF2           | 191 / 634                                  | -     | 191                                                      | 4                   | SFO                      |
| Weber,<br>2011                      | Honville<br>Loamy silt                       | 6.7                                                                                                                | 20 / 40%<br>MWHC   | 113.6 /<br>717.6                           | -     | 201.6 <sup>b)</sup>                                      | 3                   | HS <sup>e)</sup>         |
|                                     | Arrow<br>Sandy loam                          | 5.7                                                                                                                | 20 / 50%<br>MWHC   | 44.7 / 97.0                                | -     | 22.5 <sup>c)</sup>                                       | 14                  | HS <sup>f)</sup>         |
| Atkins,<br>1993b                    | Fayette<br>Sandy loam                        | 6.6                                                                                                                | 25 / 75%<br>FC     | >1000 /<br>>1000                           | 0.17  | 1000                                                     | 17.1                | SFO                      |
| Atkins,<br>1994b <sup>g)</sup>      | Madison<br>Sandy loam                        | 6.1                                                                                                                | 25 / 75%<br>FC     | >1000 /<br>>1000                           | 0.38  | 1000                                                     | 17.9                | SFO                      |
| Rhodes,<br>1987*                    | Keyport; silt<br>loam                        | 4.3                                                                                                                | 25°C / 70%<br>FC   | 208 / 691                                  | -     | 254                                                      | 6                   | SFO                      |
| Morlock<br>(2006a)*                 | Soil 2.2;<br>loamy sand                      | 5.7<br>(H2O)                                                                                                       | 20°C / 45%<br>MWHC | 60.5 / 285                                 | -     | 67.5                                                     | 2<br>5.68           | DFOP<br>SFO              |
| Morlock<br>(2006a)*                 | Soil 3A; sandy<br>loam                       | 7.3<br>(H2O)                                                                                                       | 20°C / 45%<br>MWHC | 280.4 /<br>>1000                           | -     | 385 <sup>c)</sup>                                        | 2                   | HS <sup>g)</sup>         |
| Morlock<br>(2006a)*                 | Soil 6S; clay<br>loam                        | 7.1<br>(H2O)                                                                                                       | 20°C / 45%<br>MWHC | 333.2 / 1107                               | -     | 230.1                                                    | 1                   | SFO                      |

| TRIAZINE AMINE<br>(CGA150829)  |                      | Dark aerobic conditions. Metabolite dosed or the precursor from which the f.f. was derived was parent prosulfuron. |                   |                                            |                    |                                                          |                     |                          |
|--------------------------------|----------------------|--------------------------------------------------------------------------------------------------------------------|-------------------|--------------------------------------------|--------------------|----------------------------------------------------------|---------------------|--------------------------|
| Study                          | Soil type            | pH                                                                                                                 | t. °C / %<br>MWHC | DT <sub>50</sub> / DT <sub>90</sub><br>(d) | f. f.              | DT <sub>50</sub> (d)<br>20 °C<br>pF2/10kPa <sup>a)</sup> | St.<br>( $\chi^2$ ) | Method of<br>calculation |
| Wonders and Melkebeke (2002)** | Speyer 2.1; sand     | 5.5                                                                                                                | 20°C / pF2        | 112.5 / 374                                | -                  | 112.5                                                    | 3                   | SFO                      |
| Wonders and Melkebeke (2002)** | Soil 115; clay loam  | 8.6                                                                                                                | 20°C / pF2        | 175.2 / 582                                | -                  | 175.2                                                    | 3                   | SFO                      |
| Wonders and Melkebeke (2002)** | Soil 243; sandy loam | 5.6                                                                                                                | 20°C / pF2        | 96.4 / 320.2                               | -                  | 96.4                                                     | 6                   | SFO                      |
| Geomean (n=19)                 |                      |                                                                                                                    |                   |                                            |                    | 215.7 <sup>d)</sup>                                      |                     |                          |
| Arithmetic mean (n=6)          |                      |                                                                                                                    |                   |                                            | 0.28 <sup>d)</sup> |                                                          |                     |                          |

a) Normalised using a Q<sub>10</sub> of 2.58 and Walker equation coefficient of 0.7

b) Calculated from slow phase ( $\ln(2)/k_2$ ); normalised value (correction factor  $(18.76/27)^{0.7}$ ).

c) Calculated from slow phase or second phase ( $\ln(2)/k_2$ )

d) Geometric/arithmetic mean of replicate soils calculated first (18 Acres (pH 5.84) 259 days / ffM 0.32). The median soil DT<sub>50</sub> used in the available exposure assessment was 196 days, which was derived from the 18 soil DT<sub>50</sub> values available including the additional data accepted in the peer review of other sulfonyl urea active substances (i.e. thifensulfuron methyl and metsulfuron methyl).

e)  $k_1=0.01772$ ,  $k_2=0.00266$ ,  $t_b=25.93434$

f)  $k_1=0$  (fixed; lag phase),  $k_2=0.03082$ ,  $t_b=22.25$

g)  $k_1=0.013$ ,  $k_2=0.002$ ,  $t_b=20$

\*Metabolite dosed studies, accepted in the RAR for thifensulfuron-methyl: Rhodes (1987), Morlock (2006a), also incorporating an updated kinetic assessment for soil 3A presented in the RAR of tibenuron-methyl and agreed by the Peer review.

\*\*Metabolite dosed studies, accepted in the RAR for metsulfuron methyl: Wonders and Melkebeke (2002).

| PROSULFURON<br>PHENYL<br>SULFONAMIDE<br>(CGA159902) |                                      | Dark aerobic conditions. Metabolite dosed or the precursor from which the f.f. was derived was parent prosulfuron. |                   |                                            |       |                                                          |                     |                          |
|-----------------------------------------------------|--------------------------------------|--------------------------------------------------------------------------------------------------------------------|-------------------|--------------------------------------------|-------|----------------------------------------------------------|---------------------|--------------------------|
| Study                                               | Soil type                            | pH                                                                                                                 | t. °C / %<br>MWHC | DT <sub>50</sub> / DT <sub>90</sub><br>(d) | f. f. | DT <sub>50</sub> (d)<br>20 °C<br>pF2/10kPa <sup>a)</sup> | St.<br>( $\chi^2$ ) | Method of<br>calculation |
| Fahrbach, 2011                                      | 18 Acres (phenyl)<br>Sandy clay loam | 5.84                                                                                                               | 20 / pF2          | 90.6 / 301                                 | 0.36  | 90.6                                                     | 16.4                | SFO                      |
| Berdar & Nicollier, 2006                            | 18 Acres<br>Sandy clay loam          | 5.0                                                                                                                | 20 / pF2          | 7.5 / 373                                  | -     | 173 <sup>b)</sup>                                        | 5.3                 | DFOP <sup>c)</sup>       |
|                                                     | Gartenacker<br>Loam                  | 6.9                                                                                                                | 20 / pF2          | 3.1 / 140                                  | -     | 169 <sup>b)</sup>                                        | 11.3                | HS <sup>d)</sup>         |
|                                                     | Krone<br>Silt loam                   | 4.9                                                                                                                | 20 / pF2          | 89.7 / 298                                 | -     | 89.7                                                     | 8.9                 | SFO                      |
| Atkins, 1993a                                       | Fayette<br>Sandy loam                | 6.6                                                                                                                | 25 / 75% FC       | >1000 /<br>>1000                           | 0.49  | 1000                                                     | 9.1                 | SFO                      |



| PROSULFURON<br>PHENYL<br>SULFONAMIDE<br>(CGA159902) |           | Dark aerobic conditions. Metabolite dosed or the precursor from which the f.f. was derived was parent prosulfuron. |                   |                                            |       |                                                          |                     |                          |
|-----------------------------------------------------|-----------|--------------------------------------------------------------------------------------------------------------------|-------------------|--------------------------------------------|-------|----------------------------------------------------------|---------------------|--------------------------|
| Study                                               | Soil type | pH                                                                                                                 | t. °C / %<br>MWHC | DT <sub>50</sub> / DT <sub>90</sub><br>(d) | f. f. | DT <sub>50</sub> (d)<br>20 °C<br>pF2/10kPa <sup>a)</sup> | St.<br>( $\chi^2$ ) | Method of<br>calculation |
| Geometric mean (n=5)                                |           |                                                                                                                    |                   |                                            |       | 188                                                      |                     |                          |
| Arithmetic mean (n=2)                               |           |                                                                                                                    |                   |                                            | 0.43  |                                                          |                     |                          |

a) Normalised using a Q<sub>10</sub> of 2.58 and Walker equation coefficient of 0.7

b) Calculated from slow phase (ln(2)/k<sub>2</sub>)

c) k<sub>1</sub>=0.2796, k<sub>2</sub>=0.0040, g=0.5553

d) k<sub>1</sub>=0.2256, k<sub>2</sub>=0.0041, t<sub>b</sub>=7.8046

| O-DESMETHYL-<br>PROSULFURON<br>(CGA300406) |                                           | Dark aerobic conditions. The precursor from which the f.f. was derived was parent prosulfuron. |                   |                                               |                    |                                                          |                     |                          |
|--------------------------------------------|-------------------------------------------|------------------------------------------------------------------------------------------------|-------------------|-----------------------------------------------|--------------------|----------------------------------------------------------|---------------------|--------------------------|
| Study                                      | Soil type                                 | pH                                                                                             | t. °C / %<br>MWHC | DT <sub>50</sub> /<br>DT <sub>90</sub><br>(d) | f. f.              | DT <sub>50</sub> (d)<br>20 °C<br>pF2/10kPa <sup>a)</sup> | St.<br>( $\chi^2$ ) | Method of<br>calculation |
| Fahrbach,<br>2011                          | 18 Acres<br>(phenyl)<br>Sandy clay loam   | 5.84                                                                                           | 20 / pF2          | 4.3 / 13.3                                    | 0.48               | 4.3                                                      | 25.4                | SFO                      |
|                                            | 18 Acres<br>(triazine)<br>Sandy clay loam | 5.84                                                                                           | 20 / pF2          | 4.0 / 14.4                                    | 0.40               | 4.0                                                      | 20.9                | SFO                      |
| Fahrbach,<br>2011a                         | 18 Acres<br>(triazine)<br>Sandy clay loam | 5.84                                                                                           | 20 / pF2          | 4.1 / 13.7                                    | 0.51               | 4.1                                                      | 10.5                | SFO                      |
|                                            | Vétroz (triazine)<br>Loam                 | 7.77                                                                                           | 20 / pF2          | 25.4 /<br>84.4                                | 0.56               | 25.4                                                     | 10.0                | SFO                      |
|                                            | Krone (triazine)<br>Silt loam             | 5.38                                                                                           | 20 / pF2          | 2.6 / 8.8                                     | 0.29               | 2.6                                                      | 29.6                | SFO                      |
| Reischmann,<br>1994 <sup>c)</sup>          | Les Evouettes<br>(phenyl)<br>Silt loam    | 7.3                                                                                            | 20 / 40%<br>MWHC  | 47.5 /<br>158                                 | 0.46               | 30.2                                                     | 11.3                | SFO                      |
| Reischmann,<br>1995 <sup>d)</sup>          | Les Evouettes<br>(phenyl)<br>Silt loam    | 7.0                                                                                            | 20 / 60%<br>FC    | 23.3 /<br>77.5                                | 0.68               | 21.0                                                     | 14.0                | SFO                      |
| Geometric mean (n= 4)                      |                                           |                                                                                                |                   |                                               |                    | 9.1 <sup>b)</sup>                                        |                     |                          |
| Arithmetic mean (n= 4)                     |                                           |                                                                                                |                   |                                               | 0.47 <sup>b)</sup> |                                                          |                     |                          |

a) Normalised using a Q<sub>10</sub> of 2.58 and Walker equation coefficient of 0.7

b) Geometric/arithmetic mean of replicate soils calculated first (18 Acres 4.1 days / 0.46; Les Evouettes 25.2 days / 0.57)

c) In the original DAR Reischmann 1994a

d) In the original DAR Reischmann 1994b

| CGA325025                                                  |                                | Dark aerobic conditions. Metabolite dosed. |                   |                                            |                    |                                                          |                     |                                 |
|------------------------------------------------------------|--------------------------------|--------------------------------------------|-------------------|--------------------------------------------|--------------------|----------------------------------------------------------|---------------------|---------------------------------|
| Study                                                      | Soil type                      | pH                                         | t. °C / %<br>MWHC | DT <sub>50</sub> / DT <sub>90</sub><br>(d) | f. f.              | DT <sub>50</sub> (d)<br>20 °C<br>pF2/10kPa <sup>a)</sup> | St.<br>( $\chi^2$ ) | Method<br>of<br>calculatio<br>n |
| Hurt,<br>Mason &<br>Hamlet,<br>2011                        | 18 Acres<br>Sandy clay<br>loam | 5.0                                        | 20 / pF2          | 50.1 / 167                                 | -                  | 50.1                                                     | 5.7                 | SFO                             |
|                                                            | Gartenacker<br>Loam            | 6.9                                        | 20 / pF2          | 102 / 340                                  | -                  | 102                                                      | 7.0                 | SFO                             |
|                                                            | Krone<br>Silt loam             | 4.9                                        | 20 / pF2          | 47.4 / 157                                 | -                  | 47.4                                                     | 6.9                 | SFO                             |
| Geometric mean (n=3)                                       |                                |                                            |                   |                                            |                    | 62.4                                                     |                     |                                 |
| Assumed ffm (from O-DESMETHYL-<br>PROSULFURON (CGA300406)) |                                |                                            |                   |                                            | 0.12 <sup>b)</sup> |                                                          |                     |                                 |

<sup>a)</sup> Normalised using a Q<sub>10</sub> of 2.58 and Walker equation coefficient of 0.7

<sup>b)</sup> Assumed ffm from O-DESMETHYL-PROSULFURON (CGA300406), calculated by (1-ffm\_SYN542604)

| SYN542604                         |                                           | Dark aerobic conditions. Metabolite dosed or the precursor from which the f.f. was derived was metabolite O-DESMETHYL-PROSULFURON (CGA300406). |                   |                                               |       |                                                          |                     |                          |
|-----------------------------------|-------------------------------------------|------------------------------------------------------------------------------------------------------------------------------------------------|-------------------|-----------------------------------------------|-------|----------------------------------------------------------|---------------------|--------------------------|
| Study                             | Soil type                                 | pH                                                                                                                                             | t. °C / %<br>MWHC | DT <sub>50</sub> /<br>DT <sub>90</sub><br>(d) | f. f. | DT <sub>50</sub> (d)<br>20 °C<br>pF2/10kPa <sup>a)</sup> | St.<br>( $\chi^2$ ) | Method of<br>calculation |
| Fahrbach,<br>2011                 | 18 Acres<br>(phenyl)<br>Sandy clay loam   | 5.84                                                                                                                                           | 20 / pF2          | 150 / 499                                     | 1.00  | 150                                                      | 2.6                 | SFO                      |
|                                   | 18 Acres<br>(triazine)<br>Sandy clay loam | 5.84                                                                                                                                           | 20 / pF2          | 142 / 472                                     | 1.00  | 142                                                      | 6.1                 | SFO                      |
| Fahrbach,<br>2011a                | 18 Acres<br>(triazine)<br>Sandy clay loam | 5.84                                                                                                                                           | 20 / pF2          | 184 / 611                                     | 0.73  | 184                                                      | 3.8                 | SFO                      |
|                                   | Vétroz (triazine)<br>Loam                 | 7.77                                                                                                                                           | 20 / pF2          | 61.5 /<br>204                                 | 0.87  | 61.5                                                     | 19.6                | SFO                      |
|                                   | Krone (triazine)<br>Silt loam             | 5.38                                                                                                                                           | 20 / pF2          | 125 / 415                                     | 1.00  | 125                                                      | 5.5                 | SFO                      |
|                                   | Nebraska<br>(triazine)<br>Silt loam       | 6.61                                                                                                                                           | 20 / pF2          | 118 / 391                                     | 1.00  | 118                                                      | 8.5                 | SFO                      |
| Reischmann,<br>1994 <sup>c)</sup> | Les Evouettes<br>(phenyl)<br>Silt loam    | 7.3                                                                                                                                            | 20 / 40%<br>MWHC  | 81.9/ 272                                     | 0.66  | 52.0                                                     | 17.5                | SFO                      |
| Reischmann,<br>1995 <sup>d)</sup> | Les Evouettes<br>(phenyl)<br>Silt loam    | 7.0                                                                                                                                            | 20 / 60%<br>FC    | 56.6 /<br>188                                 | 0.54  | 51.0                                                     | 9.6                 | SFO                      |
| Hurt, Mason<br>& Hamlet,          | 18 Acres<br>Sandy clay loam               | 5.0                                                                                                                                            | 20 / pF2          | 102 / 340                                     | -     | 102                                                      | 6.0                 | SFO                      |

| SYN542604             |                  | Dark aerobic conditions. Metabolite dosed or the precursor from which the f.f. was derived was metabolite O-DESMETHYL-PROSULFURON (CGA300406). |                |                                               |                    |                                                          |                     |                       |
|-----------------------|------------------|------------------------------------------------------------------------------------------------------------------------------------------------|----------------|-----------------------------------------------|--------------------|----------------------------------------------------------|---------------------|-----------------------|
| Study                 | Soil type        | pH                                                                                                                                             | t. °C / % MWHC | DT <sub>50</sub> /<br>DT <sub>90</sub><br>(d) | f. f.              | DT <sub>50</sub> (d)<br>20 °C<br>pF2/10kPa <sup>a)</sup> | St.<br>( $\chi^2$ ) | Method of calculation |
| 2011                  | Gartenacker Loam | 6.9                                                                                                                                            | 20 / pF2       | 25.0 / 83.2                                   | -                  | 25.0                                                     | 9.8                 | SFO                   |
|                       | Krone Silt loam  | 4.9                                                                                                                                            | 20 / pF2       | 140 / 464                                     | -                  | 140                                                      | 6.1                 | SFO                   |
| Geometric mean (n=8)  |                  |                                                                                                                                                |                |                                               |                    | 84.6 <sup>b)</sup>                                       |                     |                       |
| Arithmetic mean (n=5) |                  |                                                                                                                                                |                |                                               | 0.88 <sup>b)</sup> |                                                          |                     |                       |

a) Normalised using a Q<sub>10</sub> of 2.58 and Walker equation coefficient of 0.7

b) Geometric/arithmetic mean of replicate soils calculated first (18 Acres (pH 5.84) 158 days / 0.91; Les Evouettes 51.5 days / 0.60)

c) In the original DAR Reischmann 1994a

d) In the original DAR Reischmann 1994b

| CGA349707                      |                                  | Dark aerobic conditions. Metabolite dosed or the precursor from which the f.f. was derived was metabolite SYN542604. |                |                                               |       |                                                          |                     |                       |
|--------------------------------|----------------------------------|----------------------------------------------------------------------------------------------------------------------|----------------|-----------------------------------------------|-------|----------------------------------------------------------|---------------------|-----------------------|
| Study                          | Soil type                        | pH                                                                                                                   | t. °C / % MWHC | DT <sub>50</sub> /<br>DT <sub>90</sub><br>(d) | f. f. | DT <sub>50</sub> (d)<br>20 °C<br>pF2/10kPa <sup>a)</sup> | St.<br>( $\chi^2$ ) | Method of calculation |
| Kuet, 2006                     | 18 Acres Sandy clay loam         | 5.0                                                                                                                  | 20 / pF2       | 113 / 376                                     | -     | 113                                                      | 2.8                 | SFO                   |
|                                | Gartenacker Loam                 | 6.9                                                                                                                  | 20 / pF2       | 91.9 / 305                                    | -     | 91.9                                                     | 3.0                 | SFO                   |
|                                | Krone Silt loam                  | 4.9                                                                                                                  | 20 / pF2       | 140 / 466                                     | -     | 140                                                      | 2.2                 | SFO                   |
| Reischmann, 1994 <sup>c)</sup> | Les Evouettes (phenyl) Silt loam | 7.3                                                                                                                  | 20 / 40% MWHC  | 331 / >1000                                   | 1.00  | 210                                                      | 10.6                | SFO                   |
| Reischmann, 1995 <sup>d)</sup> | Les Evouettes (phenyl) Silt loam | 7.0                                                                                                                  | 20 / 60% FC    | 737 / >1000                                   | 0.72  | 663                                                      | 7.8                 | SFO                   |
| Geometric mean (n=7)           |                                  |                                                                                                                      |                |                                               |       | 153 <sup>b)</sup>                                        |                     |                       |
| Arithmetic mean (n=2)          |                                  |                                                                                                                      |                |                                               | 0.86  |                                                          |                     |                       |

a) Normalised using a Q<sub>10</sub> of 2.58 and Walker equation coefficient of 0.7

b) Geometric mean of replicate soils calculated first (Les Evouettes 373 days)

c) In the original DAR Reischmann 1994a

d) In the original DAR Reischmann 1994b

| SYN547308                       |                                | Dark aerobic conditions. Metabolite dosed. |                   |                                            |       |                                                             |                     |                                 |
|---------------------------------|--------------------------------|--------------------------------------------|-------------------|--------------------------------------------|-------|-------------------------------------------------------------|---------------------|---------------------------------|
| Study                           | Soil type                      | pH                                         | t. °C / %<br>MWHC | DT <sub>50</sub> / DT <sub>90</sub><br>(d) | f. f. | DT <sub>50</sub> (d)<br>20 °C<br>pF2/10kPa<br><sup>a)</sup> | St.<br>( $\chi^2$ ) | Method<br>of<br>calculati<br>on |
| Gilbert,<br>2014<br>Patel, 2014 | Vétroz<br>Loam                 | 7.7                                        | 20 / pF2          | 174 / 654                                  | -     | 207 <sup>b)</sup>                                           | 1.18                | DFOP                            |
|                                 | 18 Acres<br>Sandy clay<br>loam | 5.8                                        | 20 / pF2          | 17.6 / 120                                 | -     | 36.4 <sup>c)</sup>                                          | 3.77                | FOMC                            |
|                                 | Krone<br>Silt loam             | 5.0                                        | 20 / pF2          | 7.79 / 133                                 | -     | 40.1 <sup>c)</sup>                                          | 2.40                | FOMC                            |
| Geometric mean (n=3)            |                                |                                            |                   |                                            |       | 67.1                                                        |                     |                                 |
| Arithmetic mean                 |                                |                                            |                   |                                            | -     |                                                             |                     |                                 |

<sup>a)</sup> Normalised using a Q<sub>10</sub> of 2.58 and Walker equation coefficient of 0.7

<sup>b)</sup> Ln(2)/k<sub>2</sub>

<sup>c)</sup> DT<sub>90</sub>/3.32

#### Field studies ‡

| Parent                                                             | Aerobic conditions – Persistence endpoints |     |               |                                      |                                |                                  |                     |                          |
|--------------------------------------------------------------------|--------------------------------------------|-----|---------------|--------------------------------------|--------------------------------|----------------------------------|---------------------|--------------------------|
| Soil type<br>(indicate if<br>bare or<br>cropped soil<br>was used). | Location<br>(country or<br>USA state).     | pH  | Depth<br>(cm) | DissT <sub>50</sub><br>(d)<br>actual | DT <sub>90</sub> (d)<br>actual | DT <sub>50</sub><br>(d)<br>Norm. | St.<br>( $\chi^2$ ) | Method of<br>calculation |
| Sandy loam<br>Bare soil                                            | Altratjensdorf,<br>Germany                 | 6.1 | 30            | 38.9                                 | 129                            | -                                | 10.2                | SFO                      |
| Silt loam<br>Bare soil                                             | Wallesdorf,<br>Germany                     | 6.8 | 30            | 4.3                                  | 30.2                           | -                                | 5.2                 | DFOP <sup>a)</sup>       |
| Loamy sand<br>Bare soil                                            | Coesfeld,<br>Germany                       | 4.9 | 20            | 16.1                                 | 53.4                           | -                                | 15.8                | SFO                      |
| Silt loam<br>Bare soil                                             | Uhrsleben,<br>Germany                      | 6.2 | 20            | 18.5                                 | 61.4                           | -                                | 16.9                | SFO                      |
| Sandy loam<br>Bare soil                                            | Altratjensdorf,<br>Germany                 | 6.2 | 20            | 7.8                                  | 25.9                           | -                                | 13.6                | SFO                      |
| Sandy loam<br>Bare soil                                            | Herxheimweyh<br>er,<br>Germany             | 6.8 | 20            | 10.0                                 | 33.1                           | -                                | 4.4                 | SFO                      |
| Silt loam<br>Maize                                                 | Vouvry,<br>Switzerland                     | 7.8 | 30            | 4.6                                  | 30.9                           | -                                | 1.1                 | FOMC <sup>b)</sup>       |
| Loamy sand<br>Maize                                                | Vouvry,<br>Switzerland                     | 7.8 | 30            | 4.6                                  | 15.2                           | -                                | 5.7                 | SFO                      |
| Sandy loam<br>Maize                                                | Camisano,<br>Vicentino,<br>Italy           | 7.4 | 30            | 3.8                                  | 54.5                           | -                                | 1.1                 | DFOP <sup>c)</sup>       |
| Silt loam<br>Maize                                                 | Estillac,<br>France                        | 7.0 | 30            | 15.6                                 | 51.9                           | -                                | 14.5                | SFO                      |
| Silt loam<br>Bare soil                                             | Estillac,<br>France                        | 7.0 | 30            | 6.1                                  | 20.4                           | -                                | 14.9                | SFO                      |

| Parent                                                    | Aerobic conditions – Persistence endpoints |      |               |                                      |                                |                                  |                     |                       |
|-----------------------------------------------------------|--------------------------------------------|------|---------------|--------------------------------------|--------------------------------|----------------------------------|---------------------|-----------------------|
| Soil type<br>(indicate if bare or cropped soil was used). | Location<br>(country or USA state).        | pH   | Depth<br>(cm) | DissT <sub>50</sub><br>(d)<br>actual | DT <sub>90</sub> (d)<br>actual | DT <sub>50</sub><br>(d)<br>Norm. | St.<br>( $\chi^2$ ) | Method of calculation |
| Sandy loam<br>Bare soil                                   | Bogense,<br>Denmark                        | 6.48 | 20            | 4.6                                  | 55.8                           | -                                | 8.23                | DFOP <sup>d)</sup>    |
| Silt loam<br>Bare soil                                    | Castelsarrasin,<br>France                  | 6.06 | 10            | 11.4                                 | 38.0                           | -                                | 12.4                | SFO                   |
| Loam<br>Bare soil                                         | St. Cyprien,<br>France                     | 7.4  | 20            | 17.4                                 | 150                            | -                                | 5.5                 | DFOP <sup>e)</sup>    |
| Clay loam<br>Bare soil                                    | Breitenwisch,<br>Germany                   | 5.32 | 10            | 9.01                                 | 29.9                           | -                                | 12.6                | SFO                   |
| Clay<br>Bare soil                                         | Canals, Spain                              | 7.6  | 20            | 20.5                                 | 98.1                           | -                                | 6.83                | DFOP <sup>f)</sup>    |
| Loam<br>Bare soil                                         | Wilson, UK                                 | 7.07 | 10            | 12.5                                 | 41.6                           | -                                | 17.8                | SFO                   |
| Geometric mean                                            |                                            |      |               |                                      |                                | -                                |                     |                       |
| Median                                                    |                                            |      |               |                                      |                                | -                                |                     |                       |

- a)  $k_1=0.1952$ ,  $k_2=0.0080$ ,  $g=0.8758$   
b)  $\alpha=1.3659$ ,  $\beta=7.0222$   
c)  $k_1=0.3106$ ,  $k_2=0.0207$ ,  $g=0.6918$   
d)  $k_1=2.989$ ,  $k_2=0.03143$ ,  $g=0.4222$   
e)  $k_1=0.1201$ ,  $k_2=0.01126$ ,  $g=0.4615$   
f)  $k_1=0.4408$ ,  $k_2=0.02076$ ,  $g=0.2342$

| Parent                                                    | Aerobic conditions – modelling endpoints (normalisation with measured soil moisture data) |                         |                          |                         |                     |                                |
|-----------------------------------------------------------|-------------------------------------------------------------------------------------------|-------------------------|--------------------------|-------------------------|---------------------|--------------------------------|
| Soil type<br>(indicate if bare or cropped soil was used). | Location<br>(country or USA state).                                                       | pH (CaCl <sub>2</sub> ) | Depth (cm) <sup>a)</sup> | DegT50 (d)<br>20°C, pF2 | St.<br>( $\chi^2$ ) | Method of calculation          |
| Sandy loam<br>(bare soil)                                 | Bogense,<br>Denmark                                                                       | 6.48                    | 20                       | 18.6                    | 7.49                | DFOP<br>DT <sub>90</sub> /3.32 |
| Silt loam<br>(bare soil)                                  | Castelsarrasin,<br>France                                                                 | 6.06                    | 10                       | 15.5                    | 12.6                | SFO                            |
| Loam<br>(bare soil)                                       | St. Cyprien,<br>France                                                                    | 7.4                     | 20                       | 27.8                    | 14.9                | SFO                            |
| Clay loam<br>(bare soil)                                  | Breitenwisch,<br>Germany                                                                  | 5.32                    | 10                       | 9.96                    | 11.4                | SFO                            |
| Clay<br>(bare soil)                                       | Canals, Spain                                                                             | 7.6                     | 20                       | 43.5                    | 10.9                | SFO                            |
| Loam<br>(bare soil)                                       | Wilson, UK                                                                                | 7.07                    | 10                       | 12.2                    | 18.5                | SFO                            |
| <b>Geometric mean (n=6)</b>                               |                                                                                           |                         |                          | <b>18.7</b>             |                     |                                |

pH dependence ‡  
(yes / no) (if yes type of dependence)

No. For metabolite O-DESMETHYL-PROSULFURON (CGA300406) dependency can be seen and this has been taken into account in PECgw calculations.

Laboratory studies ‡

| Parent                | Anaerobic conditions |     |                |                                        |                                     |                       |                       |
|-----------------------|----------------------|-----|----------------|----------------------------------------|-------------------------------------|-----------------------|-----------------------|
| Soil type             | Label                | pH  | t. °C / % MWHC | DT <sub>50</sub> /DT <sub>90</sub> (d) | DT <sub>50</sub> (d) 20°C pF2/10kPa | St. (r <sup>2</sup> ) | Method of calculation |
| Sandy loam            | Phenyl               | 6.6 | 25 / 75% FC    | 89 / -                                 | -                                   | -                     | -                     |
| Sandy loam            | Triazine             | 6.6 | 25 / 75% FC    | 123 / -                                | -                                   | -                     | -                     |
| Sandy loam            | Triazine             | 6.1 | 25 / 75% FC    | 138 / -                                | -                                   | -                     | -                     |
| Geometric mean/median |                      |     |                | -                                      | -                                   |                       |                       |

### Soil adsorption/desorption (Annex IIA, point 7.1.2)

| Parent ‡                 |       |                      |                       |                        |                       |                         |       |
|--------------------------|-------|----------------------|-----------------------|------------------------|-----------------------|-------------------------|-------|
| Soil type                | OC %  | Soil pH <sup>#</sup> | K <sub>d</sub> (mL/g) | K <sub>oc</sub> (mL/g) | K <sub>f</sub> (mL/g) | K <sub>foc</sub> (mL/g) | 1/n   |
| Loamy sand               | 0.46  | 7.7                  | -                     | -                      | 0.07                  | 15.2                    | 0.82  |
| Sandy loam               | 1.97  | 7.8                  | -                     | -                      | 0.27                  | 13.7                    | 0.85  |
| Silt loam                | 1.74  | 6.5                  | -                     | -                      | 0.29                  | 16.7                    | 0.86  |
| Silty clay loam          | 0.67  | 6.9                  | -                     | -                      | 0.25                  | 37.3                    | 0.86  |
| Loamy sand               | 0.76  | 7.0                  | -                     | -                      | 0.03                  | 3.9                     | 0.92  |
| Sand                     | 0.36  | 6.6                  | -                     | -                      | 0.09                  | 25.0*                   | 1.21* |
| Silt loam                | 2.10  | 7.3                  | -                     | -                      | 0.24                  | 11.4                    | 0.81  |
| Silt loam                | 4.39  | 7.1                  | -                     | -                      | 0.36                  | 8.2                     | 0.89  |
| Humic silt loam          | 19.34 | 6.6                  | -                     | -                      | 1.45                  | 7.50                    | 0.94  |
| Arithmetic mean (n=8)    |       |                      |                       |                        |                       | 14.2                    | 0.869 |
| Geometric mean (n=8)     |       |                      |                       |                        |                       | 11.7                    | -     |
| pH dependence, Yes or No |       |                      | No                    |                        |                       |                         |       |

\* The 1/n value of 1.21 was originally excluded from the dataset as considered outside the range of the expected value. However, in this case, it is considered that this omission adversely affects the results of the exposure assessment.

<sup>#</sup> No information on which media pH was measured

| TRIAZINE AMINE (CGA150829) ‡ |      |                  |                       |                        |                       |                         |        |
|------------------------------|------|------------------|-----------------------|------------------------|-----------------------|-------------------------|--------|
| Soil type                    | OC % | Soil pH          | K <sub>d</sub> (mL/g) | K <sub>oc</sub> (mL/g) | K <sub>f</sub> (mL/g) | K <sub>foc</sub> (mL/g) | 1/n    |
| Sand                         | 0.35 | 7.9 <sup>#</sup> | -                     | -                      | 0.23                  | 66.7                    | 0.8702 |

|                                |      |                  |   |    |        |                        |         |
|--------------------------------|------|------------------|---|----|--------|------------------------|---------|
| Sandy Loam                     | 0.99 | 7.8 <sup>#</sup> | - | -  | 0.57   | 58.2                   | 0.9024  |
| Silt Loam                      | 1.74 | 6.5 <sup>#</sup> | - | -  | 0.96   | 55.1                   | 0.8474  |
| Silty Clay Loam                | 0.70 | 6.9 <sup>#</sup> | - | -  | 1.20   | 172                    | 0.8230  |
| Loam                           | 1.8  | 5.3 <sup>§</sup> | - | -  | 1.321  | 73.4                   | 0.9183  |
| Silt loam                      | 2.4  | 6.6 <sup>§</sup> | - | -  | 0.481  | 20.0                   | 0.9755  |
| Clay loam                      | 0.9  | 7.6 <sup>§</sup> | - | -  | 0.561  | 62.3                   | 0.9170  |
| Sandy loam                     | 0.7  | 6.7 <sup>§</sup> | - | -  | 0.675  | 96.5                   | 0.9498  |
| Silt loam                      | 1.7  | 6.6 <sup>§</sup> | - | -  | 3.147  | 185.1                  | 0.9021  |
| Sandy soil                     | 0.58 | 6.2 <sup>#</sup> | - | -  | 0.264  | 45.5                   | 0.873   |
| Sandy loam                     | 0.46 | 6.3 <sup>#</sup> | - | -  | 0.621  | 133.8                  | 0.784   |
| Silt loam                      | 1.1  | 5.3 <sup>#</sup> | - | -  | 2.36   | 214.2                  | 0.841   |
| Silty clay loam                | 3.0  | 5.7 <sup>#</sup> | - | -  | 6.80   | 225.5                  | 0.841   |
| Silt loam                      | 1.2  | 7.7 <sup>#</sup> | - | -  | 0.225  | 18.8                   | 1.05    |
| Sandy loam                     | 2.3  | 5.7 <sup>#</sup> | - | -  | 0.682  | 29.7                   | 0.94    |
| Silt loam                      | 2.6  | 6.4 <sup>#</sup> | - | -  | 0.433  | 16.7                   | 0.96    |
| Loamy silt                     | 0.91 | 6.7 <sup>#</sup> | - | -  | 1.57   | 172                    | 0.835   |
| Silt loam                      | 2.08 | 7.0 <sup>#</sup> | - | -  | 0.44   | 21.3                   | 0.873   |
| Loamy sand                     | 1.95 | 6.0 <sup>#</sup> | - | -  | 0.30   | 15.4                   | 0.909   |
| Sandy loam                     | 0.43 | 6.0 <sup>#</sup> | - | -  | 0.32   | 74.4                   | 0.840   |
| Speyer 2.1*                    | 0.56 | 6.0 <sup>#</sup> | - | -  | 0.2025 | 36                     | 0.92    |
| Standard soil no. 115*         | 1.7  | 7.4 <sup>#</sup> | - | -  | 0.6255 | 37                     | 0.89    |
| Standard soil no. 164*         | 3.0  | 6.5 <sup>#</sup> | - | -  | 0.645  | 22                     | 0.92    |
| Standard soil no. 243*         | 1.1  | 4.3 <sup>#</sup> | - | -  | 0.337  | 31                     | 0.91    |
| Sand, Germany**                | 1.97 | 5.4 <sup>#</sup> | - | -  | 0.37   | 18.92                  | 0.640   |
| Loam, Germany**                | 2.42 | 7.3 <sup>#</sup> | - | -  | 0.43   | 17.97                  | 0.759   |
| Clay, Germany**                | 1.84 | 6.9 <sup>#</sup> | - | -  | 0.43   | 2.95                   | 1.422   |
| Arithmetic mean/median (n= 27) |      |                  |   |    |        | 71.2/45.5 <sup>§</sup> | 0.90/nr |
| Geometric mean (n=27)          |      |                  |   |    |        | 45.6                   | -       |
| pH dependence, Yes or No       |      |                  |   | No |        |                        |         |

<sup>#</sup> No information on which media pH was measured

<sup>§</sup> CaCl<sub>2</sub>

\* Endpoints derived from the study Van Noorlos & Slagen (2001) accepted in the RAR for metsulfuron-methyl, Endpoints not used in the available exposure assessment.

\*\* Endpoints derived from the study Morlock (2006) accepted in the RAR for metsulfuron-methyl, Endpoints not used in the available exposure assessment.

| PROSULFURON PHENYL SULFONAMIDE (CGA159902) ‡ |      |                      |    |     |    |      |     |
|----------------------------------------------|------|----------------------|----|-----|----|------|-----|
| Soil type                                    | OC % | Soil pH <sup>#</sup> | Kd | Koc | Kf | Kfoc | 1/n |

|                          |      |     | (mL/g) | (mL/g) | (mL/g) | (mL/g) |      |
|--------------------------|------|-----|--------|--------|--------|--------|------|
| Loamy sand               | 0.46 | 7.7 | -      | -      | 0.40   | 87.0   | 0.93 |
| Sandy loam               | 1.97 | 7.8 | -      | -      | 1.24   | 62.9   | 0.83 |
| Silt loam                | 1.74 | 6.5 | -      | -      | 0.77   | 44.3   | 0.81 |
| Silty clay loam          | 0.67 | 6.9 | -      | -      | 0.59   | 88.1   | 0.94 |
| Arithmetic mean (n=4)    |      |     |        |        |        | 70.6   | 0.88 |
| Geometric mean (n=4)     |      |     |        |        |        | 68.0   | -    |
| pH dependence, Yes or No |      |     | No     |        |        |        |      |

# No information on which media pH was measured

| O-DESMETHYL-PROSULFURON (CGA300406) ‡ |      |                      |           |            |           |             |       |
|---------------------------------------|------|----------------------|-----------|------------|-----------|-------------|-------|
| Soil type                             | OC % | Soil pH <sup>#</sup> | Kd (mL/g) | Koc (mL/g) | Kf (mL/g) | Kfoc (mL/g) | 1/n   |
| Loamy sand                            | 0.42 | 6.5                  | -         | -          | 0.53      | 126*        | 1.24* |
| Sandy loam                            | 1.0  | 6.8                  | -         | -          | 0.49      | 49.0        | 0.87  |
| Loam                                  | 1.11 | 6.7                  | -         | -          | 0.47      | 42.3        | 0.89  |
| Silty clay loam                       | 2.59 | 6.4                  | -         | -          | 1.28      | 49.4        | 0.93  |
| Arithmetic mean (n=3)                 |      |                      |           |            |           | 46.9        | 0.90  |
| Geometric mean (n=3)                  |      |                      |           |            |           | 46.8        | -     |
| pH dependence, Yes or No              |      |                      | No        |            |           |             |       |

\* The 1/n value of 1.24 was originally excluded from the dataset as considered outside the range of the expected value. However, in this case, it is considered that this omission adversely affects the results of the exposure assessment.

# No information on which media pH was measured

| demethoxy amino-prosulfosulfuron (CGA 325025) ‡ |      |                      |           |            |           |             |       |
|-------------------------------------------------|------|----------------------|-----------|------------|-----------|-------------|-------|
| Soil type                                       | OC % | Soil pH <sup>#</sup> | Kd (mL/g) | Koc (mL/g) | Kf (mL/g) | Kfoc (mL/g) | 1/n   |
| Sandy loam                                      | 1.0  | 6.8                  | -         | -          | 0.242     | 24.2        | 1.042 |
| Sand                                            | 0.42 | 6.5                  | -         | -          | 0.135     | 32.2        | 0.853 |
| Loam                                            | 1.15 | 6.7                  | -         | -          | 0.336     | 29.2        | 0.939 |
| Clay                                            | 1.67 | 6.8                  | -         | -          | 0.346     | 20.7        | 1.057 |
| Arithmetic mean (n=4)                           |      |                      |           |            |           | 26.6        | 0.973 |
| Geometric mean (n=4)                            |      |                      |           |            |           | 26.2        | -     |
| pH dependence, Yes or No                        |      |                      | No        |            |           |             |       |

# No information on which media pH was measured

| SYN542604 ‡     |      |                              |           |            |           |             |      |
|-----------------|------|------------------------------|-----------|------------|-----------|-------------|------|
| Soil type       | OC % | Soil pH (CaCl <sub>2</sub> ) | Kd (mL/g) | Koc (mL/g) | Kf (mL/g) | Kfoc (mL/g) | 1/n  |
| Sandy clay loam | 2.21 | 5.84                         | -         | -          | 3.01      | 136         | 0.88 |



|                          |      |      |   |    |      |     |      |
|--------------------------|------|------|---|----|------|-----|------|
| Loam                     | 1.97 | 7.77 | - | -  | 1.14 | 58  | 0.82 |
| Silt loam                | 1.14 | 5.38 | - | -  | 0.98 | 86  | 0.88 |
| Silt loam                | 1.72 | 6.61 | - | -  | 3.84 | 223 | 0.80 |
| Sandy loam               | 0.51 | 7.20 | - | -  | 0.57 | 112 | 0.86 |
| Arithmetic mean (n=5)    |      |      |   |    |      | 123 | 0.85 |
| Geometric mean (n=5)     |      |      |   |    |      | 111 | -    |
| pH dependence, Yes or No |      |      |   | No |      |     |      |

|                          |      |                            |           |            |           |             |      |
|--------------------------|------|----------------------------|-----------|------------|-----------|-------------|------|
| CGA349707 ‡              |      |                            |           |            |           |             |      |
| Soil type                | OC % | Soil pH (H <sub>2</sub> O) | Kd (mL/g) | Koc (mL/g) | Kf (mL/g) | Kfoc (mL/g) | 1/n  |
| Loamy sand               | 2.0  | 7.6                        | -         | -          | 1.03      | 51.7        | 0.96 |
| Silt loam                | 2.4  | 7.2                        | -         | -          | 0.88      | 36.7        | 0.85 |
| Silt loam                | 4.7  | 7.2                        | -         | -          | 2.11      | 44.9        | 1.08 |
| Arithmetic mean (n=3)    |      |                            |           |            |           | 44.4        | 0.96 |
| Geometric mean (n=3)     |      |                            |           |            |           | 44.0        | -    |
| pH dependence, Yes or No |      |                            |           | No         |           |             |      |

|                                             |      |                            |           |                                                                                         |           |                  |                     |
|---------------------------------------------|------|----------------------------|-----------|-----------------------------------------------------------------------------------------|-----------|------------------|---------------------|
| SYN547308 ‡                                 |      |                            |           |                                                                                         |           |                  |                     |
| Soil type                                   | OC % | Soil pH (H <sub>2</sub> O) | Kd (mL/g) | Koc (mL/g)                                                                              | Kf (mL/g) | Kfoc (mL/g)      | 1/n                 |
| Loam                                        | 2.3  | 8.3                        | -         | -                                                                                       | 1.49      | 65               | 0.9318              |
| Sandy clay loam                             | 3.0  | 6.5                        | -         | -                                                                                       | 2.89      | 96               | 0.9527              |
| Silt loam <sup>1</sup>                      | 1.3  | 6.0                        | -         | -                                                                                       | 3.74      | 288 <sup>1</sup> | 0.9501 <sup>1</sup> |
| Sandy loam                                  | 0.5  | 8.2                        | -         | -                                                                                       | 0.42      | 83               | 0.9193              |
| Silt loam                                   | 1.8  | 6.7                        | -         | -                                                                                       | 2.23      | 124              | 0.9127              |
| Arithmetic mean (n=4) (soils with pH ≥ 6.5) |      |                            |           |                                                                                         |           | -                | 0.929               |
| Geometric mean (n=4) (soils with pH ≥ 6.5)  |      |                            |           |                                                                                         |           | 89.5             | -                   |
| pH dependence, Yes or No                    |      |                            |           | Yes (conservative geometric mean was derived since pH dependence could not be excluded) |           |                  |                     |

<sup>1</sup> This soil was excluded from arithmetic/geometric mean due to potential pH dependence.

### Mobility in soil (Annex IIA, point 7.1.3, Annex IIIA, point 9.1.2)

Column leaching ‡

4 soils (OC 0.4 - 2.6 %, pH 6.4 - 6.7), triazine label, 508 mm. RA in leachates : 54 - 95 % (prosulfuron)

4 soils (OC 0.4 - 4.4 %, pH 5.7 - 7.1), phenyl label, 200 mm. RA in leachates : 1 - 94 % depending on OC content (prosulfuron)

Aged residues leaching ‡

4 soils (OC 0.4 - 2.6 %, pH 6.4 - 7.0), 2 labels, 30 d

incubation at 25°C, 508 mm  
 Residue prosulfuron 70 - 84 %, metabolites < 12 % (CGA 300406)  
 RA in leachates : 33 - 59 %, mainly prosulfuron, metabolites < 4 % each

2 soils (OC 1.7 - 2.1 %, pH 7.2 - 7.3), 2 labels, 180 d incubation at 20°C, 200 mm  
 Residue : prosulfuron 18 - 31 %, metabolites <10 % each (CGA 159902, 150829, 300406, 349707, M5), CO<sub>2</sub> 10 - 45 %  
 RA in leachates : 0.8 - 12 % of applied to columns (prosulfuron)

## Lysimeter/ field leaching studies ‡

USA, undisturbed 20 cm diameter soil columns, silt loam (1.94 % OC, pH 5.6) in Kentucky and sand soil (0.3 % OC, pH 4.9) in North Carolina, 2 labels, 44 g as/ha. Overflow occurred in Kentucky.  
 Total residues in drainage water (LOD 0.4 µg/l) soil depth 0.90 m  
 Silt loam:  
 < 0.4 %, mean conc. 0.13 µg/l (phenyl); < 0.1 % (triazine)  
 Sand:  
 mean 0.98 µg/l max. 3 µg/l (phenyl); mean 0.08 µg/l max. 1 µg/l (triazine)  
 Compounds in drainage water from sand soil, NC  
 prosulfuron traces in initial preferential flow soil depth 0.90 m  
 prosulfuron phenyl sulfonamide (CGA159902) max. 2.4 µg/l  
 M5 (derivative of prosulfuron phenyl sulfonamide (CGA159902)) max. 1 µg/l  
 CGA325028 max. 0.74 µg/l  
 O-desmethyl-prosulfuron (CGA300406) max. 0.08 µg/l  
 No realistic mean concentrations can be calculated for individual compounds. Triazine moiety less mobile than phenyl moiety. No prosulfuron triazine amine (CGA150829) in soil after 1 year.

Swiss lysimeter, sandy soil (1.05 % OC, pH 6.1), phenyl label, 28 or 2 x 28 g as/ha (Spring)  
 Total residues (LOD 0.05 µg/l)  
 mean concentrations, soil depth 1.2 m  
 1 appl. 0.23 / 0.12 / 0.07 µg/l (year 1 / 2 / 3)  
 2 appl. 0.24 / 0.31 / 0.22 µg/l (year 1 / 2 / 3)  
 max. concentrations 0.46 / 0.42 µg/l (1 / 2 appl.)

Prosulfuron, prosulfuron phenyl sulfonamide (CGA159902), O-desmethyl-prosulfuron (CGA300406), CGA349707, SYN542604 (M5), demethoxy amino-prosulfosulfuron (CGA 325025) and unknowns < 0.1 µg/l each. Total extractable RA in soil < 2.5 µg/kg after 3 years.

### Route and rate of degradation in water (Annex IIA, point 7.2.1)

Hydrolytic degradation of the active substance and metabolites > 10 % ‡

pH 5 (25°C)  
 DT<sub>50</sub> 5 - 12 d  
 prosulfuron phenyl sulfonamide (CGA159902) 58 %  
 prosulfuron triazine amine (CGA150829) 43 %  
 prosulfuron polyimide (CGA325030) 22-31 %  
 G28533 16 %

pH 7 (25°C)  
 DT<sub>50</sub> 424 - 651 d

pH 9 (25°C)  
 DT<sub>50</sub> 682 - 1690 d  
 (no major metabolite at pH 7 and 9)

### PEC (ground water) (Annex IIIA, point 9.2.1)

Method of calculation and type of study (*e.g.* modelling, field leaching, lysimeter )

Models used: FOCUS-PELMO 5.5.3 and FOCUS-PEARL 4.4.4, FOCUS-MACRO 5.5.4

The following PEC<sub>gw</sub> were calculated in a context of amendment of the approval conditions (to remove the restriction to application once every 3 years) and to respond to Data requirement by EFSA.

Input parameters for prosulfuron:

Molar mass = 419.4 g/mol

Water solubility = 43000 mg/L (20°C), 86000 mg/L (30°C)

Vapour pressure = 0 Pa (20°C), 0 Pa (30°C)

K<sub>foc</sub> = 11.7 mL/g (geometric mean, n=8)

1/n = 0.869

DT<sub>50</sub> = 19.6 days (normalised field geometric mean, pseudo-SFO, n=6). The correct value to be used for further calculations is 18.7 days.

Plant uptake factor = 0.15

Input parameters for prosulfuron triazine amine (CGA150829):

Molar mass = 140.1 g/mol  
Water solubility = 1000 mg/L (considered conservative)  
Vapour pressure = 0 Pa  
Kfoc = 45.6 mL/g (n=27)  
1/n = 0.9 (n=27)  
DT<sub>50</sub> = 196 days (normalised laboratory, median, SFO, n= 18). The correct value to be used for further calculations is 216 days  
ffM = 0.28 (from prosulfuron).  
Plant uptake factor = 0

Input parameters for prosulfuron phenyl sulfonamide (CGA159902):

Molar mass = 253.2 g/mol  
Water solubility = 1000 mg/L (considered conservative)  
Vapour pressure = 0 Pa  
Kfoc = 68.0 mL/g (geometric mean, n=4); Kfom = 39.4 mL/g  
1/n = 0.88  
DT<sub>50</sub> = 188 days (normalised laboratory geometric mean, SFO, n=5)  
ffM = 0.43 (from prosulfuron)  
Plant uptake factor = 0

Input parameters for O-desmethyl-prosulfuron (CGA300406):

Molar mass = 405.4 g/mol  
Water solubility = 1000 mg/L (considered conservative)  
Vapour pressure = 0 Pa  
Kfoc = 46.8 mL/g (geometric mean, n=3); Kfom = 27.1 mL/g  
1/n = 0.90  
DT<sub>50</sub> = 30.2 days (maximum laboratory DT<sub>50</sub> representing alkaline conditions, SFO); 2.6 days (minimum laboratory DT<sub>50</sub> representing acidic conditions, SFO)  
ffM = 0.47 (from prosulfuron).  
Plant uptake factor = 0

Input parameters for demethoxy amino-prosulfosulfuron (CGA 325025):

Molar mass = 404.4 g/mol  
Water solubility = 1000 mg/L (considered conservative)

Vapour pressure = 0 Pa

Kfoc = 26.2 mL/g (geometric mean, n=4); Kfom = 15.2 mL/g

1/n = 0.973

DT<sub>50</sub> = 62.4 days (normalised laboratory geometric mean, SFO, n=3)

ffM = 0.12 (from O-desmethyl-prosulfuron (CGA300406))

Plant uptake factor = 0

Input parameters for SYN542604:

Molar mass = 381.3 g/mol

Water solubility = 1000 mg/L (considered conservative)

Vapour pressure = 0 Pa

Kfoc = 111 mL/g (geometric mean, n=5); Kfom = 64.4 mL/g

1/n = 0.85

DT<sub>50</sub> = 84.6 days (normalised laboratory geometric mean, SFO, n=8).

ffM = 0.88 (from O-desmethyl-prosulfuron (CGA300406))

Plant uptake factor = 0

Input parameters for CGA349707:

Molar mass = 338.3 g/mol

Water solubility = 1000 mg/L (considered conservative)

Vapour pressure = 0 Pa

Kfoc = 44.0 mL/g (geometric mean, n=3); Kfom = 25.5 mL/g

1/n = 0.96

DT<sub>50</sub> = 153 days (normalised laboratory geometric mean, SFO, n=4)

ffM = 0.86 (from SYN542604)

Plant uptake factor = 0

Input parameters for SYN547308:

Molar mass = 449.4 g/mol

Water solubility = 1000 mg/L (considered conservative)

Vapour pressure = 0 Pa

Kfoc = 89.5 mL/g; Kfom = 51.9 mL/g

1/n = 0.929

DT<sub>50</sub> = 67.1 days (normalised laboratory geometric mean, SFO, n=4)

ffM = 0.5 (from prosulfuron)

Plant uptake factor = 0

**Data gap identified to address potential ground water contamination by soil metabolite M17**

Number of applications: 1 in every year of simulation

Rate of application: 15 and 20 g as/ha

Application date: 3 days post-emergence

Crop interception: 25% (maize BBCH 12-18)

Application rate

**PEC (gw) – FOCUS modelling result (80<sup>th</sup> percentile annual average concentration at 1m)**

PEC<sub>gw</sub> using a minimum DT<sub>50</sub> of 2.6 days for CGA300406:

| Scenario | Parent (µg/L) | Metabolite (µg/L)                    |                                          |                                   |           |           |                                            |           |
|----------|---------------|--------------------------------------|------------------------------------------|-----------------------------------|-----------|-----------|--------------------------------------------|-----------|
|          |               | prosulfuron triazine amine CGA150829 | prosulfuron phenyl sulfonamide CGA159902 | O-desmethyl-prosulfuron CGA300406 | SYN542604 | CGA349707 | demethoxy amino-prosulfosulfuron CGA325025 | SYN547308 |
| Cha      | 0.052         | 0.176                                | 0.297                                    | 0.001                             | 0.025     | 0.715     | 0.073                                      | 0.140     |
| Ham      | 0.124         | 0.216                                | 0.373                                    | 0.005                             | 0.047     | 0.924     | 0.108                                      | 0.206     |
| Jok      | -             | -                                    | -                                        | -                                 | -         | -         | -                                          | -         |
| Kre      | 0.080         | 0.160                                | 0.277                                    | 0.003                             | 0.046     | 0.634     | 0.074                                      | 0.183     |
| Oke      | 0.125         | 0.151                                | 0.299                                    | 0.004                             | 0.058     | 0.548     | 0.068                                      | 0.223     |
| Pia      | 0.025         | 0.180                                | 0.276                                    | 0.001                             | 0.028     | 0.741     | 0.056                                      | 0.138     |
| Por      | 0.011         | 0.084                                | 0.139                                    | < 0.001                           | 0.006     | 0.374     | 0.034                                      | 0.060     |
| Sev      | < 0.001       | 0.071                                | 0.058                                    | < 0.001                           | < 0.001   | 0.353     | 0.016                                      | 0.009     |
| Thi      | 0.015         | 0.228                                | 0.337                                    | < 0.001                           | 0.009     | 0.953     | 0.065                                      | 0.080     |

| Scenario | Parent (µg/L) | Metabolite (µg/L)                    |                                          |                                   |           |           |                                            |           |
|----------|---------------|--------------------------------------|------------------------------------------|-----------------------------------|-----------|-----------|--------------------------------------------|-----------|
|          |               | prosulfuron triazine amine CGA150829 | prosulfuron phenyl sulfonamide CGA159902 | O-desmethyl-prosulfuron CGA300406 | SYN542604 | CGA349707 | demethoxy amino-prosulfosulfuron CGA325025 | SYN547308 |
| Cha      | 0.027         | 0.163                                | 0.260                                    | 0.001                             | 0.015     | 0.680     | 0.061                                      | 0.098     |
| Ham      | 0.073         | 0.174                                | 0.298                                    | 0.003                             | 0.029     | 0.740     | 0.082                                      | 0.160     |
| Jok      | -             | -                                    | -                                        | -                                 | -         | -         | -                                          | -         |
| Kre      | 0.075         | 0.157                                | 0.270                                    | 0.002                             | 0.039     | 0.649     | 0.069                                      | 0.169     |
| Oke      | 0.110         | 0.145                                | 0.285                                    | 0.003                             | 0.045     | 0.502     | 0.065                                      | 0.203     |
| Pia      | 0.038         | 0.130                                | 0.227                                    | 0.002                             | 0.032     | 0.498     | 0.054                                      | 0.148     |
| Por      | 0.010         | 0.081                                | 0.139                                    | < 0.001                           | 0.006     | 0.377     | 0.033                                      | 0.060     |

|                      |          |               |                                      |                                          |                                   |           |           |                                            |           |
|----------------------|----------|---------------|--------------------------------------|------------------------------------------|-----------------------------------|-----------|-----------|--------------------------------------------|-----------|
|                      | Sev      | 0.001         | 0.060                                | 0.042                                    | < 0.001                           | < 0.001   | 0.326     | 0.016                                      | 0.004     |
|                      | Thi      | 0.008         | 0.190                                | 0.256                                    | < 0.001                           | 0.004     | 0.741     | 0.050                                      | 0.050     |
| MACRO 5.5.4/maize 20 | Scenario | Parent (µg/L) | Metabolite (µg/L)                    |                                          |                                   |           |           |                                            |           |
|                      |          |               | prosulfuron triazine amine CGA150829 | prosulfuron phenyl sulfonamide CGA159902 | O-desmethyl-prosulfuron CGA300406 | SYN542604 | CGA349707 | demethoxy amino-prosulfosulfuron CGA325025 | SYN547308 |
|                      | Cha      | 0.022         | 0.132                                | 0.202                                    | <0.001                            | 0.008     | 0.503     | 0.044                                      | 0.071     |

|                           |          |               |                                      |                                          |                                   |           |           |                                            |           |
|---------------------------|----------|---------------|--------------------------------------|------------------------------------------|-----------------------------------|-----------|-----------|--------------------------------------------|-----------|
| PEARL 4.4.4/maize 15 g/ha | Scenario | Parent (µg/L) | Metabolite (µg/L)                    |                                          |                                   |           |           |                                            |           |
|                           |          |               | prosulfuron triazine amine CGA150829 | prosulfuron phenyl sulfonamide CGA159902 | O-desmethyl-prosulfuron CGA300406 | SYN542604 | CGA349707 | demethoxy amino-prosulfosulfuron CGA325025 | SYN547308 |
|                           | Cha      | 0.036         | 0.129                                | 0.211                                    | 0.001                             | 0.016     | 0.531     | 0.054                                      | 0.100     |
|                           | Ham      | 0.086         | 0.158                                | 0.268                                    | 0.004                             | 0.031     | 0.687     | 0.080                                      | 0.148     |
|                           | Jok      | -             | -                                    | -                                        | -                                 | -         | -         | -                                          | -         |
|                           | Kre      | 0.057         | 0.117                                | 0.200                                    | 0.002                             | 0.032     | 0.473     | 0.055                                      | 0.131     |
|                           | Oke      | 0.089         | 0.112                                | 0.217                                    | 0.003                             | 0.039     | 0.410     | 0.051                                      | 0.162     |
|                           | Pia      | 0.018         | 0.131                                | 0.198                                    | <0.001                            | 0.019     | 0.549     | 0.042                                      | 0.100     |
|                           | Por      | 0.007         | 0.062                                | 0.100                                    | <0.001                            | 0.004     | 0.278     | 0.025                                      | 0.043     |
|                           | Sev      | <0.001        | 0.051                                | 0.039                                    | <0.001                            | <0.001    | 0.261     | 0.012                                      | 0.006     |
| Thi                       | 0.010    | 0.166         | 0.237                                | <0.001                                   | 0.006                             | 0.702     | 0.048     | 0.056                                      |           |

|                           |          |               |                                      |                                          |                                   |           |           |                                            |           |
|---------------------------|----------|---------------|--------------------------------------|------------------------------------------|-----------------------------------|-----------|-----------|--------------------------------------------|-----------|
| PELMO 5.5.3/maize 15 g/ha | Scenario | Parent (µg/L) | Metabolite (µg/L)                    |                                          |                                   |           |           |                                            |           |
|                           |          |               | prosulfuron triazine amine CGA150829 | prosulfuron phenyl sulfonamide CGA159902 | O-desmethyl-prosulfuron CGA300406 | SYN542604 | CGA349707 | demethoxy amino-prosulfosulfuron CGA325025 | SYN547308 |
|                           | Cha      | 0.019         | 0.119                                | 0.186                                    | 0.001                             | 0.010     | 0.505     | 0.045                                      | 0.070     |
|                           | Ham      | 0.054         | 0.127                                | 0.214                                    | 0.002                             | 0.020     | 0.551     | 0.061                                      | 0.115     |
|                           | Jok      | -             | -                                    | -                                        | -                                 | -         | -         | -                                          | -         |
|                           | Kre      | 0.053         | 0.115                                | 0.196                                    | 0.002                             | 0.027     | 0.482     | 0.051                                      | 0.122     |
|                           | Oke      | 0.080         | 0.107                                | 0.206                                    | 0.002                             | 0.031     | 0.375     | 0.049                                      | 0.147     |
|                           | Pia      | 0.027         | 0.095                                | 0.164                                    | 0.001                             | 0.022     | 0.371     | 0.040                                      | 0.108     |
|                           | Por      | 0.007         | 0.060                                | 0.100                                    | <0.001                            | 0.004     | 0.281     | 0.025                                      | 0.043     |
|                           | Sev      | 0.001         | 0.043                                | 0.028                                    | <0.001                            | <0.001    | 0.240     | 0.012                                      | 0.003     |
| Thi                       | 0.005    | 0.138         | 0.178                                | <0.001                                   | 0.003                             | 0.549     | 0.037     | 0.035                                      |           |

|   |          |        |                   |  |  |  |  |  |  |
|---|----------|--------|-------------------|--|--|--|--|--|--|
| M | Scenario | Parent | Metabolite (µg/L) |  |  |  |  |  |  |
|---|----------|--------|-------------------|--|--|--|--|--|--|

|  |     |             |                                                   |                                                           |                                                  |               |               |                                                          |               |
|--|-----|-------------|---------------------------------------------------|-----------------------------------------------------------|--------------------------------------------------|---------------|---------------|----------------------------------------------------------|---------------|
|  | o   | t<br>(µg/L) | prosulfuron<br>triazine<br>amine<br>CGA15082<br>9 | prosulfuron<br>phenyl<br>sulfonamid<br>e<br>CGA15990<br>2 | O-<br>desmethyl-<br>prosulfuron<br>CGA30040<br>6 | SYN54260<br>4 | CGA34970<br>7 | demethoxy<br>amino-<br>prosulfosulfuro<br>n<br>CGA325025 | SYN54730<br>8 |
|  | Cha | 0.015       | 0.096                                             | 0.144                                                     | <0.001                                           | 0.006         | 0.374         | 0.033                                                    | 0.051         |

PEC<sub>gw</sub> using a maximum DT<sub>50</sub> of 30.2 days for CGA300406:

|                           |          |                  |                                                   |                                                           |                                                  |               |               |                                                          |               |
|---------------------------|----------|------------------|---------------------------------------------------|-----------------------------------------------------------|--------------------------------------------------|---------------|---------------|----------------------------------------------------------|---------------|
| PEARL 4.4.4/maize 20 g/ha | Scenario | Parent<br>(µg/L) | Metabolite (µg/L)                                 |                                                           |                                                  |               |               |                                                          |               |
|                           |          |                  | prosulfuron<br>triazine<br>amine<br>CGA15082<br>9 | prosulfuron<br>phenyl<br>sulfonamid<br>e<br>CGA15990<br>2 | O-<br>desmethyl-<br>prosulfuron<br>CGA30040<br>6 | SYN54260<br>4 | CGA34970<br>7 | demethoxy<br>amino-<br>prosulfosulfuro<br>n<br>CGA325025 | SYN54730<br>8 |
|                           | Cha      | 0.052            | 0.177                                             | 0.298                                                     | 0.041                                            | 0.058         | 0.754         | 0.084                                                    | 0.140         |
|                           | Ham      | 0.125            | 0.216                                             | 0.373                                                     | 0.080                                            | 0.083         | 0.959         | 0.124                                                    | 0.207         |
|                           | Jok      | -                | -                                                 | -                                                         | -                                                | -             | -             | -                                                        | -             |
|                           | Kre      | 0.081            | 0.160                                             | 0.277                                                     | 0.072                                            | 0.078         | 0.642         | 0.084                                                    | 0.183         |
|                           | Oke      | 0.127            | 0.151                                             | 0.300                                                     | 0.088                                            | 0.092         | 0.539         | 0.075                                                    | 0.223         |
|                           | Pia      | 0.025            | 0.181                                             | 0.277                                                     | 0.040                                            | 0.052         | 0.811         | 0.071                                                    | 0.138         |
|                           | Por      | 0.011            | 0.084                                             | 0.139                                                     | 0.013                                            | 0.017         | 0.393         | 0.044                                                    | 0.060         |
|                           | Sev      | < 0.001          | 0.071                                             | 0.059                                                     | < 0.001                                          | < 0.001       | 0.393         | 0.024                                                    | 0.009         |
| Thi                       | 0.015    | 0.228            | 0.339                                             | 0.018                                                     | 0.033                                            | 1.07          | 0.081         | 0.081                                                    |               |

|                           |          |                  |                                                   |                                                           |                                                  |               |               |                                                          |               |
|---------------------------|----------|------------------|---------------------------------------------------|-----------------------------------------------------------|--------------------------------------------------|---------------|---------------|----------------------------------------------------------|---------------|
| PELMO 5.5.3/maize 20 g/ha | Scenario | Parent<br>(µg/L) | Metabolite (µg/L)                                 |                                                           |                                                  |               |               |                                                          |               |
|                           |          |                  | prosulfuron<br>triazine<br>amine<br>CGA15082<br>9 | prosulfuron<br>phenyl<br>sulfonamid<br>e<br>CGA15990<br>2 | O-<br>desmethyl-<br>prosulfuron<br>CGA30040<br>6 | SYN54260<br>4 | CGA34970<br>7 | demethoxy<br>amino-<br>prosulfosulfuro<br>n<br>CGA325025 | SYN54730<br>8 |
|                           | Cha      | 0.027            | 0.163                                             | 0.260                                                     | 0.027                                            | 0.039         | 0.728         | 0.074                                                    | 0.098         |
|                           | Ham      | 0.073            | 0.174                                             | 0.298                                                     | 0.045                                            | 0.055         | 0.764         | 0.095                                                    | 0.160         |
|                           | Jok      | -                | -                                                 | -                                                         | -                                                | -             | -             | -                                                        | -             |
|                           | Kre      | 0.075            | 0.157                                             | 0.270                                                     | 0.065                                            | 0.069         | 0.662         | 0.077                                                    | 0.169         |
|                           | Oke      | 0.110            | 0.145                                             | 0.285                                                     | 0.077                                            | 0.079         | 0.497         | 0.070                                                    | 0.203         |
|                           | Pia      | 0.038            | 0.130                                             | 0.227                                                     | 0.048                                            | 0.055         | 0.522         | 0.062                                                    | 0.148         |
|                           | Por      | 0.010            | 0.081                                             | 0.139                                                     | 0.015                                            | 0.017         | 0.398         | 0.042                                                    | 0.060         |
|                           | Sev      | 0.001            | 0.060                                             | 0.042                                                     | 0.001                                            | 0.001         | 0.358         | 0.023                                                    | 0.004         |
| Thi                       | 0.008    | 0.190            | 0.256                                             | 0.009                                                     | 0.017                                            | 0.808         | 0.064         | 0.050                                                    |               |

|   |          |        |                   |
|---|----------|--------|-------------------|
| M | Scenario | Parent | Metabolite (µg/L) |
|---|----------|--------|-------------------|



|  |     |             |                                                   |                                                           |                                                  |               |               |                                                          |               |
|--|-----|-------------|---------------------------------------------------|-----------------------------------------------------------|--------------------------------------------------|---------------|---------------|----------------------------------------------------------|---------------|
|  | o   | t<br>(µg/L) | prosulfuron<br>triazine<br>amine<br>CGA15082<br>9 | prosulfuron<br>phenyl<br>sulfonamid<br>e<br>CGA15990<br>2 | O-<br>desmethyl-<br>prosulfuron<br>CGA30040<br>6 | SYN54260<br>4 | CGA34970<br>7 | demethoxy<br>amino-<br>prosulfosulfuro<br>n<br>CGA325025 | SYN54730<br>8 |
|  | Cha | 0.022       | 0.132                                             | 0.202                                                     | 0.017                                            | 0.008         | 0.503         | 0.044                                                    | 0.071         |

|                           |          |                  |                                                   |                                                           |                                                  |               |               |                                                          |               |
|---------------------------|----------|------------------|---------------------------------------------------|-----------------------------------------------------------|--------------------------------------------------|---------------|---------------|----------------------------------------------------------|---------------|
| PEARL 4.4.4/maize 15 g/ha | Scenario | Parent<br>(µg/L) | Metabolite (µg/L)                                 |                                                           |                                                  |               |               |                                                          |               |
|                           |          |                  | prosulfuron<br>triazine<br>amine<br>CGA15082<br>9 | prosulfuron<br>phenyl<br>sulfonamid<br>e<br>CGA15990<br>2 | O-<br>desmethyl-<br>prosulfuron<br>CGA30040<br>6 | SYN54260<br>4 | CGA34970<br>7 | demethoxy<br>amino-<br>prosulfosulfuro<br>n<br>CGA325025 | SYN54730<br>8 |
|                           | Cha      | 0.036            | 0.129                                             | 0.211                                                     | 0.029                                            | 0.039         | 0.561         | 0.062                                                    | 0.100         |
|                           | Ham      | 0.086            | 0.158                                             | 0.268                                                     | 0.056                                            | 0.058         | 0.715         | 0.092                                                    | 0.148         |
|                           | Jok      | -                | -                                                 | -                                                         | -                                                | -             | -             | -                                                        | -             |
|                           | Kre      | 0.057            | 0.118                                             | 0.200                                                     | 0.051                                            | 0.053         | 0.480         | 0.062                                                    | 0.131         |
|                           | Oke      | 0.090            | 0.112                                             | 0.218                                                     | 0.063                                            | 0.064         | 0.405         | 0.056                                                    | 0.162         |
|                           | Pia      | 0.018            | 0.132                                             | 0.198                                                     | 0.029                                            | 0.035         | 0.601         | 0.053                                                    | 0.100         |
|                           | Por      | 0.007            | 0.062                                             | 0.100                                                     | 0.009                                            | 0.011         | 0.292         | 0.033                                                    | 0.043         |
|                           | Sev      | <0.001           | 0.051                                             | 0.039                                                     | <0.001                                           | <0.001        | 0.290         | 0.018                                                    | 0.006         |
| Thi                       | 0.010    | 0.166            | 0.237                                             | 0.012                                                     | 0.022                                            | 0.788         | 0.060         | 0.057                                                    |               |

|                           |          |                  |                                                   |                                                           |                                                  |               |               |                                                          |               |
|---------------------------|----------|------------------|---------------------------------------------------|-----------------------------------------------------------|--------------------------------------------------|---------------|---------------|----------------------------------------------------------|---------------|
| PELMO 5.5.3/maize 15 g/ha | Scenario | Parent<br>(µg/L) | Metabolite (µg/L)                                 |                                                           |                                                  |               |               |                                                          |               |
|                           |          |                  | prosulfuron<br>triazine<br>amine<br>CGA15082<br>9 | prosulfuron<br>phenyl<br>sulfonamid<br>e<br>CGA15990<br>2 | O-<br>desmethyl-<br>prosulfuron<br>CGA30040<br>6 | SYN54260<br>4 | CGA34970<br>7 | demethoxy<br>amino-<br>prosulfosulfuro<br>n<br>CGA325025 | SYN54730<br>8 |
|                           | Cha      | 0.019            | 0.119                                             | 0.186                                                     | 0.019                                            | 0.026         | 0.539         | 0.055                                                    | 0.070         |
|                           | Ham      | 0.054            | 0.127                                             | 0.214                                                     | 0.032                                            | 0.038         | 0.571         | 0.071                                                    | 0.115         |
|                           | Jok      | -                | -                                                 | -                                                         | -                                                | -             | -             | -                                                        | -             |
|                           | Kre      | 0.053            | 0.115                                             | 0.196                                                     | 0.045                                            | 0.048         | 0.496         | 0.057                                                    | 0.122         |
|                           | Oke      | 0.080            | 0.107                                             | 0.206                                                     | 0.055                                            | 0.054         | 0.372         | 0.052                                                    | 0.147         |
|                           | Pia      | 0.027            | 0.095                                             | 0.164                                                     | 0.035                                            | 0.038         | 0.389         | 0.046                                                    | 0.108         |
|                           | Por      | 0.007            | 0.060                                             | 0.100                                                     | 0.010                                            | 0.011         | 0.297         | 0.031                                                    | 0.043         |
|                           | Sev      | 0.001            | 0.043                                             | 0.028                                                     | <0.001                                           | <0.001        | 0.263         | 0.017                                                    | 0.003         |
| Thi                       | 0.005    | 0.138            | 0.178                                             | 0.006                                                     | 0.011                                            | 0.601         | 0.048         | 0.035                                                    |               |

|                              |          |                  |                                                   |                                                           |                                                  |               |               |                                                          |               |
|------------------------------|----------|------------------|---------------------------------------------------|-----------------------------------------------------------|--------------------------------------------------|---------------|---------------|----------------------------------------------------------|---------------|
| MACRO<br>5.5.4/maize 15 g/ha | Scenario | Parent<br>(µg/L) | Metabolite (µg/L)                                 |                                                           |                                                  |               |               |                                                          |               |
|                              |          |                  | prosulfuron<br>triazine<br>amine<br>CGA15082<br>9 | prosulfuron<br>phenyl<br>sulfonamid<br>e<br>CGA15990<br>2 | O-<br>desmethyl-<br>prosulfuron<br>CGA30040<br>6 | SYN54260<br>4 | CGA34970<br>7 | demethoxy<br>amino-<br>prosulfosulfuro<br>n<br>CGA325025 | SYN54730<br>8 |

|  |     |       |       |       |       |       |       |       |       |
|--|-----|-------|-------|-------|-------|-------|-------|-------|-------|
|  | Cha | 0.015 | 0.096 | 0.144 | 0.012 | 0.006 | 0.374 | 0.033 | 0.051 |
|--|-----|-------|-------|-------|-------|-------|-------|-------|-------|

### Data gap identified to address potential ground water contamination by soil metabolite M17

#### PEC (gw) from lysimeter / field studies

| Parent                | 1 <sup>st</sup> year                 | 2 <sup>nd</sup> year | 3 <sup>rd</sup> year |
|-----------------------|--------------------------------------|----------------------|----------------------|
| Annual average (µg/L) | Not available for separate compounds |                      |                      |

| Metabolite X          | 1 <sup>st</sup> year                 | 2 <sup>nd</sup> year | 3 <sup>rd</sup> year |
|-----------------------|--------------------------------------|----------------------|----------------------|
| Annual average (µg/L) | Not available for separate compounds |                      |                      |

#### Residues requiring further assessment

Environmental occurring residues requiring further assessment by other disciplines (toxicology and ecotoxicology) and / or requiring consideration for groundwater exposure.

Soil: prosulfuron, triazine amine (CGA150829), prosulfuron phenyl sulfonamide (CGA159902), O-desmethyl-prosulfuron (CGA300406), demethoxy amino-prosulfuron (CGA325025), SYN542604, CGA349707,

Ground water: prosulfuron, triazine amine (CGA150829), prosulfuron phenyl sulfonamide (CGA159902), O-desmethyl-prosulfuron (CGA300406), demethoxy amino-prosulfuron (CGA325025), SYN542604, CGA349707, M17 (pending identification), M18 ((SYN547308).

Surface water/  
prosulfuron, triazine amine (CGA150829), prosulfuron phenyl sulfonamide (CGA159902), O-desmethyl-prosulfuron (CGA300406), demethoxy amino-prosulfuron (CGA325025), SYN542604, CGA349707

Sediment: Prosulfuron, prosulfuron phenyl sulfonamide (CGA159902), O-desmethyl-prosulfuron (CGA300406)

Air: Prosulfuron

#### Monitoring data, if available (Annex IIA, point 7.4)

Soil (indicate location and type of study)

Not available

Surface water (indicate location and type of study)

Not available

Ground water (indicate location and type of study)

Not available

Air (indicate location and type of study)

Not available

**Ecotoxicologically relevant compounds** (consider parent and all relevant metabolites requiring further assessment from the fate section)

| Compartment |             |
|-------------|-------------|
| soil        | prosulfuron |
| water       | prosulfuron |
| sediment    | prosulfuron |
